1 A Two-Component System that Modulates Cyclic-di-GMP Metabolism Promotes *Legionella*  
2 *pneumophila* Differentiation and Viability in Low-Nutrient Conditions

3

4 Elisa D. Hughes, Brenda G. Byrne, Michele S. Swanson<sup>#</sup>

5

6 Department of Microbiology and Immunology, University of Michigan Medical School, Ann  
7 Arbor, Michigan, USA

8

9 <sup>#</sup>Address correspondence to Michele Swanson, PhD; [mswanson@umich.edu](mailto:mswanson@umich.edu)

10

11 **ABSTRACT**

12           During its life cycle, the environmental pathogen *Legionella pneumophila* alternates  
13 between a replicative and a transmissive cell type when cultured in broth, macrophages, or  
14 amoebae. Within a protozoan host, *L. pneumophila* further differentiates into the hardy cell type  
15 known as the Mature Infectious Form (MIF). The second messenger cyclic-di-GMP coordinates  
16 lifestyle changes in many bacterial species, but its role in the *L. pneumophila* life cycle is less  
17 understood. Using an *in vitro* broth culture model that approximates the intracellular transition  
18 from the replicative to transmissive form, here we investigate the contribution to *L.*  
19 *pneumophila* differentiation of a two-component system (TCS) that regulates cyclic-di-GMP  
20 metabolism. The TCS is encoded by *lpg0278-lpg0277* and is co-transcribed with *lpg0279*, which  
21 encodes a protein upregulated in MIF cells. Using a *gfp*-reporter, we demonstrate that the  
22 promoter for this operon is RpoS-dependent and induced in nutrient-limiting conditions that do  
23 not support replication. The response regulator of the TCS (Lpg0277) is a bifunctional enzyme  
24 that both synthesizes and degrades cyclic-di-GMP. Using a panel of site-directed point mutants,  
25 we show that cyclic-di-GMP synthesis mediated by a conserved GGDEF domain promotes  
26 growth arrest of replicative *L. pneumophila*, production of pigment and poly-3-hydroxybutyrate  
27 storage granules, and viability in nutrient-limiting conditions. Genetic epistasis tests predict that  
28 the MIF protein Lpg0279 acts upstream of the TCS as a negative regulator. Thus, *L.*  
29 *pneumophila* is equipped with a regulatory network in which cyclic-di-GMP stimulates the  
30 switch from a replicative to a resilient state equipped to survive in low-nutrient environments.

31

32 **IMPORTANCE**

33           Although an intracellular pathogen, *L. pneumophila* has developed mechanisms to ensure  
34 long-term survival in low-nutrient aqueous conditions. Eradication of *L. pneumophila* from  
35 contaminated water supplies has proven challenging, as outbreaks have been traced to previously  
36 remediated systems. Understanding the genetic determinants that support *L.*  
37 *pneumophila* persistence in low-nutrient environments can inform design of remediation  
38 methods. Here we characterize a genetic locus that encodes a two-component signaling system  
39 (*lpg0278-lpg0277*) and a putative regulator protein (*lpg0279*) that modulates production of the  
40 messenger molecule cyclic-di-GMP. We show that this locus promotes both *L. pneumophila* cell  
41 differentiation and survival in nutrient-limiting conditions, thus advancing our understanding of  
42 the mechanisms that contribute to *L. pneumophila* environmental resilience.

43

## 44 INTRODUCTION

45           *Legionella pneumophila* is a gram-negative bacterium commonly found in aquatic  
46 environments, where it replicates within protozoan hosts and persists within biofilms (1). When  
47 inhaled, contaminated water droplets transmit *L. pneumophila* to the human lung, where this  
48 opportunistic pathogen can infect alveolar macrophages. Studies examining the life cycle of *L.*  
49 *pneumophila* cultured in broth, macrophages, and amoebae support a developmental model in  
50 which nutrient levels govern cellular differentiation (2, 3). When nutrients are plentiful, the  
51 bacteria activate pathways that support growth; when nutrients become limiting, the progeny  
52 stop replicating and express multiple factors that promote *L. pneumophila* transmission to a new  
53 host, including flagella and the Dot/Icm Type IV secretion system (4). Within protozoan hosts, *L.*  
54 *pneumophila* can differentiate further to generate the resilient, metabolically dormant but highly

55 infectious Mature Infectious Form (MIF), a cell-type believed to be prevalent in the environment  
56 (5, 6).

57 To alternate between replication within phagocytes and persistence within nutrient-poor  
58 aquatic environments, *L. pneumophila* relies on multiple regulatory mechanisms that coordinate  
59 rapid adaptation to changing conditions (3). For example, replication in broth requires amino acids  
60 as the primary carbon source (7, 8), and a reduction in amino acid availability activates  
61 regulatory pathways that trigger conversion from the exponential (E) phase to the post-  
62 exponential (PE) transmissive phase (9, 10). The *L. pneumophila* life cycle is governed by a  
63 sophisticated regulatory network that includes the stringent response enzymes RelA and SpoT,  
64 multiple alternative sigma factors including RpoS and FliA, two-component regulatory systems,  
65 small regulatory RNAs, and CsrA post-transcriptional repressors (3, 11, 12). Driving the E to PE  
66 differentiation is a stringent response pathway coordinated by the alarmone guanosine penta- and  
67 tetraphosphate (abbreviated here as ppGpp) (13). The two-component system LetA/LetS  
68 responds to ppGpp accumulation by inducing transcription of small regulatory RNAs RsmY and  
69 RsmZ (14-16). These non-coding RNAs bind to and relieve repression by CsrA, enabling  
70 expression of multiple virulence traits associated with PE phase *L. pneumophila* including  
71 cytotoxicity, motility, and lysosome evasion (reviewed by 3).

72 Another second messenger molecule that regulates lifestyle switches in *L. pneumophila*  
73 and multiple other bacterial species is bis-(3'-5')-cyclic dimeric guanosine (c-di-GMP) (4-8).  
74 Diguanilate cyclases (DCG), which possess a conserved GGDEF motif, synthesize c-di-GMP  
75 from two molecules of GTP. Conversely, phosphodiesterases (PDE) catalyze the hydrolysis of c-  
76 di-GMP back to GMP and contain either an EAL or HD-GYP domain (17). Most bacterial  
77 species utilizing c-di-GMP produce multiple enzymes that control c-di-GMP levels; for example,

78 *Escherichia coli* encodes 29 proteins with GGDEF and/or EAL domains (18), and *Vibrio cholera*  
79 encodes over 60 such proteins (19).

80 The *L. pneumophila* genome (Philadelphia-1 and Lens strains) encodes 22 different  
81 enzymes involved in c-di-GMP metabolism, including several composite proteins possessing  
82 both GGDEF and EAL domains (20, 21). The range of activities influenced by these proteins is  
83 diverse and even includes control of opposing biological functions within the same cell. Recently  
84 Pecastings *et al.* (22) identified five c-di-GMP proteins in the Lens strain involved in biofilm  
85 regulation, three of which enhance biofilm formation while the other two inhibit this  
86 developmental program. In *L. pneumophila*, some c-di-GMP producing and degrading proteins  
87 enhance virulence by altering translocation of multiple Dot/Icm Type IV secretion system  
88 effectors, interfering with phagosome/lysosome fusion, and enhancing cytotoxicity—functions  
89 that promote replication within and transmission between host cells (20, 21). In general, GGDEF  
90 and/or EAL motifs are crucial for the protein's enzymatic activity (21). However, genetic  
91 disruption of these domains does not always cause detectable changes in the cellular c-di-GMP  
92 concentration, leaving open the possibility that some of these proteins perform regulatory roles  
93 independently of c-di-GMP metabolism (20, 22).

94 Two-component regulatory systems, classically comprised of a histidine kinase and a  
95 response regulator, are a widespread signal transduction mechanism in bacteria that enables rapid  
96 adaptation to fluctuating conditions (reviewed by 23, 24). Some response regulators contain  
97 GGDEF and/or EAL domains; when phosphorylated on a conserved aspartate residue by its  
98 cognate histidine kinase, these enzymes can alter their c-di-GMP synthesis or hydrolysis (25).  
99 For example, in *Xanthomonas campestris*, the composite GGDEF/EAL protein RavR is the  
100 response regulator in a two-component system whose activation by the histidine kinase RavA

101 shifts the enzyme from DCG to PDE activity and ultimately increases virulence (26). In the *L.*  
102 *pneumophila* Lens strain, Levet-Paulo et al. (27) characterized a putative two-component system  
103 comprised of a histidine kinase Lpl0330 and its cognate response regulator Lpl0329, a  
104 bifunctional enzyme with both a GGDEF and an EAL domain. A series of *in vitro* experiments  
105 using purified proteins demonstrated that Lpl0329 possesses both DGC and the opposing PDE  
106 enzymatic activity, and phosphotransfer from Lpl0330 to Lpl0329 reduces DGC activity (27). In  
107 the *L. pneumophila* Philadelphia-1 strain, the homolog of Lpl0330 is Lpg0278 (hereafter HK),  
108 and the homolog of Lpl0329 is Lpg0277 (hereafter RR; HK and RR collectively are hereafter the  
109 TCS). On the Philadelphia-1 chromosome located directly 5' of *lpg0278* and *lpg0277* is *lpg0279*,  
110 a gene encoding a hypothetical protein that is abundant in MIF cells (6).

111 The genetic proximity of the MIF gene *lpg0279* to the TCS-encoding *lpg0277* and  
112 *lpg0278* loci suggest potential co-regulation and related functions (28). As MIF cells are resilient  
113 forms that develop from PE phase *L. pneumophila* within protozoan hosts (10), here we test the  
114 hypothesis that the locus consisting of *lpg0279*, *lpg0278* and *lpg0277* (hereafter referred to as  
115 *lpg0279-77*) promotes persistence of *L. pneumophila* in nutrient-poor environments.

116

## 117 **RESULTS**

### 118 ***lpg0277*, *lpg0278* and *lpg0279* are co-transcribed**

119 The TCS-encoding genes *lpg0277* and *lpg0278* are located on the same DNA strand, 22 bp 3'  
120 of *lpg0279*. To test the hypothesis that these three genes constitute an operon, we analyzed RNA  
121 extracted from wild-type (WT) *L. pneumophila* cultured to PE phase in rich AYET media. After  
122 conversion to cDNA, an endpoint PCR assay was conducted using primer sets designed to span  
123 the intergenic regions between the three genes (Fig. 1A). As predicted, amplicons of ~300 bp

124 were generated by primer sets A/B as well as by primers C/D, indicating that *lpg0279* and  
125 *lpg0278* form a single transcriptional unit, as do *lpg0278* and *lpg0277* (Fig. 1B). A similar  
126 experiment was conducted to determine if this transcriptional unit includes *lpg0280*, which is  
127 located 165 bp 5' of *lpg0279* and codes for a putative transcriptional regulator of the LysR  
128 family. No product was generated for primer pairs E/F (Fig 1C), indicating that the operon  
129 consists solely of *lpg0279*, *lpg0278* and *lpg0277*.

130

### 131 **The *lpg0279-77* locus is induced at the transition from E to PE phase**

132 To begin to delineate the role of *lpg0279-77* in the *L. pneumophila* life cycle, we first  
133 analyzed the timing and conditions that induce its promoter activity. To do so, we generated a  
134 transcriptional reporter by ligating a DNA fragment corresponding to the 832 bp immediately 5'  
135 of the *lpg0279* open reading frame to a promoterless copy of the *gfp-mut3* gene encoded on  
136 plasmid pBH6119 (29), generating *plpg0279-gfp*. This transcriptional reporter was then  
137 transferred to WT *L. pneumophila*.

138 Expression of *lpg0279-gfp* was monitored in E and PE phase broth cultures, which  
139 function as proxies for the intracellular replicative and transmissive stages, respectively (2, 4).  
140 In each case, E phase cultures were sub-cultured to an OD<sub>600</sub> of 0.4-0.8 in rich AYE media,  
141 incubated at 37°C on an orbital shaker, and then GFP fluorescence and cell density were  
142 measured at 2-3 h intervals. As a reference for PE phase expression, a transcriptional reporter  
143 strain in which *gfp* expression is driven by the promoter for the flagellin subunit *flaA* (*pflaA-gfp*)  
144 was analyzed in parallel (13). Serving as the negative control was a strain carrying the  
145 promoterless *gfp* vector pBH6119. All strains grew equally well as measured by OD<sub>600</sub>, and no  
146 fluorescence was observed for the vector control (Fig. 2). Throughout E phase, the *plpg0279-gfp*

147 strain generated only minimal levels of GFP fluorescence, whereas promoter activity increased  
148 markedly upon entry into PE phase—kinetics similar to that of the *pflaA-gfp* marker of the PE  
149 transmissive phase (Fig. 2).

150

### 151 **The stationary phase sigma factor RpoS activates *lpg0279-77* expression**

152 Due to the temporal similarity of their promoter activation (Fig. 2), we postulated that  
153 transcription of *lpg0279-77* and *flaA* may be controlled by the same regulatory proteins.

154 Therefore, we assessed the contribution of a subset of the regulators known to coordinate the *L.*  
155 *pneumophila* transition from E to PE phase (16, 30-33). To do this, the *p<sub>lpg0279</sub>-gfp* and *p<sub>flaA</sub>-*  
156 *gfp* reporters were transformed into mutants lacking either the alternative sigma factors FliA ( $\sigma^{28}$ )  
157 or RpoS ( $\sigma^S/\sigma^{38}$ ), the two-component system LetA/S, or the ppGpp synthetase RelA. This panel  
158 of strains was then cultured on CYET agar at 37°C for 3 days. Visible differences in GFP  
159 expression indicated that RpoS is essential for robust transcription of *lpg0279-77*, but the other  
160 regulatory factors were not (Fig. 3A). In contrast, *p<sub>flaA</sub>-gfp* expression was only marginally  
161 diminished in the *rpoS* mutant; as expected, the FliA sigma factor was its critical regulator (Fig.  
162 3B) (32, 34). Thus, although the promoters for *flaA* and *lpg0279-77* are each induced in PE  
163 phase, their mechanisms of regulation differ; accordingly, these two loci may respond to distinct  
164 environmental signals.

165

### 166 **Expression of *lpg0279-77* increases in the absence of amino acids essential for replication**

167 First identified in *E. coli* (35), the stationary phase sigma factor RpoS is widespread in  
168 proteobacteria (36). RpoS is a key regulator of the stringent response, which facilitates bacterial  
169 adaptation to a range of stresses, including starvation (37). When nutrients become limiting,



170 replicating *L. pneumophila* accumulate the alarmone ppGpp and synthesize RpoS, which  
171 activates expression of multiple genes critical for fitness in the PE phase (3).

172 Because *lpg0279-77* transcription is RpoS-dependent, we next examined whether  
173 *lpg0279-gfp* expression by replicating bacteria was induced when nutrients were limited.  
174 Standard growth media for *L. pneumophila* consists of a rich media (AYE) supplemented with  
175 both iron and the amino acid L-cysteine, as this bacterium lacks a number of cysteine  
176 biosynthesis enzymes (38, 39). Accordingly, we first quantified *lpg0279-gfp* fluorescence in *L.*  
177 *pneumophila* cultured in AYE containing both L-cysteine and ferric nitrate, either L-cysteine or  
178 ferric nitrate alone, or neither supplement. In media supplemented with L-cysteine, either with or  
179 without additional iron, *L. pneumophila* continued to replicate for > 9 hours and did not activate  
180 the *lpg0279-77* promoter (Fig. 4A). In contrast, when cultures lacked L-cysteine, bacterial  
181 replication stalled and the *lpg0279-77* promoter was induced (Fig. 4A).

182 The yeast extract in AYE contains several amino acids including L-cysteine  
183 (bdbiosciences.com), so to more accurately address the impact of this amino acid in promoting  
184 *lpg0279-77* expression we repeated the analysis using a chemically defined medium (CDM) (38)  
185 in which L-cysteine, L-cystine, and supplemental ferric pyrophosphate were omitted. Initial  
186 experiments examined *lpg0279-gfp* fluorescence in CDM containing a range of L-cysteine  
187 concentrations: 100% (2.27 mM), 50% (1.14 mM) and 25% (0.57 mM) of the standard  
188 concentration used to support *in vitro* growth in rich AYE media. In each case, the presence of  
189 L-cysteine repressed expression of *lpg0279-gfp* by replicating *L. pneumophila* (Fig. 4B).

190 These experiments also revealed an inverse relationship between *lpg0279-77* promoter  
191 activity and bacterial growth (Figs. 4A-B; also see Fig. 2). Specifically, the absence of L-  
192 cysteine hindered bacterial replication and induced *lpg0279-77* gene expression. One

193 interpretation is that *lpg0279-77* transcription is triggered by the absence of this particular amino  
194 acid; in turn, the locus suppresses replication. Alternatively, the inability of *L. pneumophila* to  
195 replicate in the absence of an essential amino acid—in this case L-cysteine—may be a signal that  
196 induces *lpg0279-77* expression. To distinguish between these two possibilities, we examined  
197 *lpg0279-gfp* fluorescence in CDM lacking either L-serine or L-methionine, two amino acids *L.*  
198 *pneumophila* requires for growth in CDM (38). Compared to cultures in complete CDM, lack of  
199 either L-serine or L-methionine reduced replication and enhanced *lpg0279-gfp* expression (Fig.  
200 4C). Thus, *L. pneumophila* induces *lpg0279-77* promoter activity in response to nutrient-limiting  
201 conditions that impede bacterial replication.

202

203 **PE phase *L. pneumophila* lacking either the HK or RR component of the TCS, or**

204 **constitutively expressing *lpg0279*, exhibit a shortened lag phase and reduced pigmentation**

205 Based on the increase in *lpg0279-77* promoter activity observed in response to conditions  
206 that do not support *L. pneumophila* growth (Figs. 2 and 4), we next examined whether this locus  
207 influences differentiation of replicating *L. pneumophila* to the PE phase. To do so, we generated  
208 isogenic mutants containing in-frame deletions in either *lpg0279*, *lpg0278*, or *lpg0277*.

209 To assess growth of each mutant strain, overnight E phase ( $OD_{600} < 2.5$ ) or PE phase  
210 ( $OD_{600} < 3.5$ ) cultures were diluted to an  $OD_{600}$  of 0.1 in AYET, and then cell density was  
211 quantified over a 36 h period using a Bioscreen growth curve analyzer. For the E phase inocula,  
212 growth curves for each mutant resembled the WT strain (data not shown). However, for the PE  
213 phase inocula, mutants lacking either the HK ( $\Delta lpg0278$ ) or RR ( $\Delta lpg0277$ ) component of the  
214 TCS mimicked the WT E phase reference culture by exhibiting a minimal lag phase (Fig. 5A and  
215 B). Although expression of each individual WT gene from an IPTG-inducible promoter was

216 insufficient to remedy this defect (data not shown), IPTG-induced expression of the *lpg0278*-  
217 *lpg0277* locus from plasmid pHK/RR restored WT growth kinetics (Fig. 5A and B).

218 In contrast to the TCS genes, growth of mutants lacking *lpg0279* was indistinguishable  
219 from WT PE phase cultures (Fig. 5C). However, WT *L. pneumophila* constitutively expressing a  
220 plasmid-borne allele of *lpg0279* engineered to encode an optimal ribosome binding site (20)  
221 exhibited growth kinetics similar to the  $\Delta$ HK or  $\Delta$ RR mutants and E phase WT *L. pneumophila*  
222 (Fig. 5C). Therefore, constitutive expression of *lpg0279* inhibits replicating *L. pneumophila*  
223 from transitioning to PE phase, whereas the genetically-linked TCS promotes differentiation of  
224 replicating *L. pneumophila* to the PE phase.

225 To test more rigorously the impact of the TCS and *Lpg0279* on *L. pneumophila*  
226 differentiation, we quantified production of the soluble pigment pyomelanin, a late PE phase trait  
227 (40, 41). Derived from secreted homogentisic acid (HGA), this melanin-like substance is not  
228 required for intracellular survival; rather it enhances environmental fitness of *L. pneumophila* by  
229 protecting bacterial cells from the damaging effects of light and by aiding in iron acquisition  
230 through its ferric reductase activity (42, 43). When cultured in rich broth to a cell density typical  
231 of PE phase ( $OD_{600} > 3.5$ ), all strains generated minimal pigment. However, when maintained in  
232 PE phase for up to three days, WT cultures accumulated pigment, but strains that lacked either of  
233 the TCS components did not (Fig. 5D). Consistent with their growth phenotypes, deletion of the  
234 *lpg0279* gene had no effect, whereas constitutive expression of *lpg0279* by WT *L. pneumophila*  
235 inhibited pigment accumulation (Fig. 5D). Consistently, the  $\Delta$ RR mutant harboring the  
236 complementing plasmid pHK/RR produced higher levels of pigment than did the WT strain,  
237 indicating that the TCS in multi-copy may stimulate differentiation to PE phase. As TCS  
238 integrity appears essential for the transition from E to PE phase in *L. pneumophila*, we next

239 examined whether the TCS enhances *L. pneumophila* viability when nutrients are limiting. In  
240 TCS signal transduction pathways, RR activity is distal to HK; accordingly, we analyzed the RR  
241 mutant as representative of Lpg0278-0277 TCS output.

242

### 243 **The TCS facilitates PHB production and long-term survival in low-nutrient conditions**

244 Beginning in the PE phase, *L. pneumophila* generates large poly-3-hydroxybutyrate (PHB)  
245 inclusions, a reserve carbon and energy source that accumulates in MIF cells (5, 44) and  
246 enhances persistence of *L. pneumophila* in low-nutrient environments (45). Therefore, we next  
247 quantified the PHB content of WT and the  $\Delta$ RR mutant using the lipophilic dye Nile Red, a  
248 fluorescent stain that is highly specific for intracellular lipids, including PHB (46). To determine  
249 the baseline value, the fluorescence of E phase cultures in AYET was quantified. Next, after  
250 collecting WT and  $\Delta$ RR mutant cells by centrifugation, their expression of *lpg0279-77* was  
251 induced by resuspending each cell sample in CDM media lacking L-cysteine (Fig. 4B), and then  
252 the bacteria were incubated for 24 h at 37°C with aeration before a second PHB quantification.  
253 As expected, in E phase the Nile Red PHB signal for both WT and  $\Delta$ RR was negligible.  
254 However, after 24 h of nutrient limitation, the WT cells exhibited significantly greater  
255 fluorescence than did the  $\Delta$ RR mutant (Fig. 6A). Expression by the mutant of the TCS from  
256 pHK/RR not only fully remedied this defect, but also generated a PHB signal exceeding that of  
257 the WT strain. Therefore, the TCS promotes accumulation of PHB storage granules in *L.*  
258 *pneumophila*.

259 As this TCS equips replicating *L. pneumophila* to respond to nutrient limitation by  
260 transitioning to the PE phase, producing pigment, and accumulating PHB storage granules—all  
261 traits that increase resilience in the environment—we next investigated whether this TCS

262 facilitates *L. pneumophila* survival during prolonged exposure to low-nutrient conditions. To do  
263 so, we quantified CFUs of WT and  $\Delta$ RR mutant cells first in E phase and then again after 3 and 7  
264 d incubation in CDM lacking L-cysteine, as described for the Nile Red fluorescence experiments.  
265 Indeed, compared to WT, the  $\Delta$ RR strain suffered a greater loss of viability by day 7, a defect  
266 remedied by ectopic expression of the TCS locus (Fig. 6B). Therefore, *L. pneumophila*  
267 persistence in nutrient-limited conditions is enhanced by the *lpg0277* locus, which encodes an  
268 enzyme equipped to modulate levels of the second messenger c-di-GMP.

269

### 270 **The GGDEF domain of Lpg0277 promotes transition from E to PE phase**

271 Because the RR is a bifunctional enzyme with both DGC and PDE activity (27), we next  
272 examined which of these opposing functions accounts for the  $\Delta$ RR mutant phenotypes. To do so,  
273 we took advantage of the known contributions of the GGDEF and EAL amino acid motifs to  
274 DCG and PDE activity, respectively (17, 25). To abrogate DGC function, we engineered point  
275 mutant strains in which the conserved Glu-396 residue was replaced with Lys (27), generating  
276 the RR<sup>E396K</sup> allele. Likewise, to impair PDE activity, the Glu-521 residue in the EAL domain was  
277 replaced with Ala, creating the RR<sup>E521A</sup> allele (18). After confirming the DNA sequence of each  
278 *L. pneumophila* chromosomal point mutation, the corresponding mutant strains were transformed  
279 with either the complementing plasmid pHK/RR or the empty vector.

280 We first examined the growth kinetics and pigment production of the RR<sup>E396K</sup> DCG and  
281 RR<sup>E521A</sup> PDE point mutants after culturing to an OD<sub>600</sub> > 3.5, correlating with PE phase in WT  
282 cells. The RR<sup>E521A</sup> PDE mutant mimicked PE phase WT cells in growth kinetics (Fig. 7B), and  
283 its pigment production exceeded that of the WT strain (Fig. 7C). In contrast, the RR<sup>E396K</sup> DCG  
284 mutant resembled E phase WT cells, as judged by its minimal lag phase (Fig. 7A) and decreased

285 pigmentation (Fig. 7C), two defects that were complemented by ectopic expression of the WT  
286 TCS. Thus, the GGDEF motif of the RR promotes the transition of replicating *L. pneumophila* to  
287 the PE phase.

288 To further probe RR function, we genetically abrogated the ability of the RR to be  
289 phosphorylated by its cognate HK, a post-translational modification that induces a change in RR  
290 enzymatic activity (27). For this purpose, the conserved Asp-87 residue in the putative  
291 phosphoacceptor site of the RR was replaced with Asn, generating mutant strain RR<sup>D87N</sup> (27).  
292 The RR<sup>D87N</sup> phosphoacceptor mutant exhibited growth and pigmentation defects similar to that  
293 observed for both the  $\Delta$ RR and RR<sup>E396K</sup> DGC mutants (Fig. S1; also Figs. 5 & 7), indicating a  
294 functional link between TCS phosphorylation and RR DGC activity.

295 Based on our growth and pigmentation analyses, we investigated whether abrogated DGC  
296 activity accounted for the reduction in both PHB levels and viability of  $\Delta$ RR mutant cells (Fig. 6).  
297 To test this hypothesis, we exposed E phase cultures of the RR<sup>E396K</sup> DGC, RR<sup>E521A</sup> PDE, and  
298 RR<sup>D87N</sup> phosphoacceptor point mutants to CDM lacking L-cysteine, and then quantified PHB  
299 production via Nile Red fluorescence and survival via CFU enumeration, as described for the  
300  $\Delta$ RR mutant analysis (Fig. 6). As expected, PHB accumulation by the RR<sup>E521A</sup> PDE mutant was  
301 indistinguishable from WT *L. pneumophila*, and both strains survived well after 7 d exposure to  
302 CDM lacking L-cysteine (Fig. S2A). However, the RR<sup>E396K</sup> DGC and RR<sup>D87N</sup> phosphoacceptor  
303 point mutants each had reduced PHB content, as judged by Nile Red fluorescence (Figs. S2B-C).  
304 Both strains also lost viability after extended CDM exposure, a phenotype mimicking the  $\Delta$ RR  
305 strain (Fig. S2B-C and 6B). It is notable that these defects were only partially complemented,  
306 perhaps due to unknown effects of perturbed cellular c-di-GMP pools. Nevertheless, the  
307 phenotypic profile of each point mutant is consistent with a model in which DGC activity and

308 concomitant accumulation of cyclic-di-GMP stimulates replicating *L. pneumophila* to transition  
309 to PE phase and generate PHB stores that support bacterial survival in nutrient-limited conditions.

310

### 311 **Ectopic expression of *lpg0279* counteracts TCS function**

312 The spatial proximity and co-regulation of *lpg0279* with the TCS-encoding genes  
313 *lpg0277* and *lpg0278* (Fig. 1) suggest a regulatory interaction. Since WT cells constitutively  
314 expressing *lpg0279* phenocopy the growth and pigmentation defects of the  $\Delta$ RR and RR<sup>E396K</sup>  
315 DCG mutants (Figs. 5 & 7), we hypothesized that Lpg0279 functions as a negative regulator of  
316 TCS activity.

317 To investigate whether Lpg0279 acts upstream of the TCS, the RR<sup>E521A</sup> PDE point  
318 mutant—which resembles WT in the transition from E to PE phase (Fig. 7B-C)—was  
319 transformed with plasmid *plpg0279* and then treated with IPTG to induce constitutive expression.  
320 In parallel, we also transformed the RR<sup>E396K</sup> mutant with *plpg0279* to evaluate any additive  
321 effects of loss of DGC activity and gain of Lpg0279 function. After culturing both strains to an  
322 OD<sub>600</sub> > 3.5, we performed growth curve and pigmentation analyses. As expected, expression of  
323 *lpg0279* did not rescue the growth defect of the RR<sup>E396K</sup> DCG mutant strain (Fig. S3A). However,  
324 *lpg0279* expression significantly shortened the lag phase of the RR<sup>E521A</sup> PDE mutant to that of  
325 WT E phase cells (Fig. S3B). Assessment of pigment production yielded similar results, with  
326 *lpg0279* expression reducing pigment levels in the RR<sup>E521A</sup> mutant but having no effect on the  
327 RR<sup>E396K</sup> mutant cells (Fig. 8A). Furthermore, when exposed to CDM lacking L-cysteine for 7 d,  
328 both the WT and RR<sup>E521A</sup> PDE mutant strains harboring *plpg0279* suffered a significant drop in  
329 cell viability compared to the respective parent strains (Fig. 8B). These data indicate that  
330 *lpg0279* is epistatic to the TCS genes, acting as a negative regulator. In low-nutrient conditions,



331 and in the presence or absence of an inducing signal, repression by Lpg0279 is relieved,  
332 enhancing DCG activity of the RR and increasing c-di-GMP. Although the downstream effectors  
333 of c-di-GMP generated by the RR remain to be identified, the activity of this TCS stimulate *L.*  
334 *pneumophila* to switch from a replicative state to a more resilient cell type better equipped to  
335 survive in low-nutrient environments.

336

## 337 **DISCUSSION**

338 As an intracellular pathogen, *L. pneumophila* has evolved multiple mechanisms to  
339 survive and replicate in a wide variety of environments, ranging from freshwater protozoans and  
340 human lung macrophages to nutrient-poor natural or engineered water systems. To thrive in  
341 such diverse conditions, *L. pneumophila* responds to environmental stimuli by alternating  
342 between distinct cell types. Amino acid or fatty acid starvation triggers replicating *L.*  
343 *pneumophila* to transition to a highly motile and infectious transmissive form, and prolonged  
344 starvation stimulates further development to the hardy MIF cell type (5, 10, 13, 47). Using an *in*  
345 *vitro* culture model to analyze the switch between replicative, transmissive, and resilient cell  
346 types, here we identify as a regulatory component an operon designed to regulate cyclic-di-GMP  
347 metabolism. This operon consists of *lpg0279*, which codes for a protein abundant in MIF cells  
348 (6), and *lpg0278-lpg0277*, which encodes a two-component system (TCS) (27). Together,  
349 Lpg0279 and the TCS equip *L. pneumophila* to respond to nutrient deprivation by differentiating  
350 to a non-replicative cell type that generates pigment, accumulates PHB storage granules, and  
351 maintains viability.

352 The *lpg0279-77* operon is induced by the stationary phase sigma factor RpoS in response  
353 to nutrient limitation (Figs. 1-4). Indeed, to survive prolonged amino acid limitation, *L.*



354 *pneumophila* require not only a functional TCS (Fig. 6B) but also RpoS (48). Thus, RpoS equips  
355 *L. pneumophila* to express factors that enhance resilience in nutrient-poor environments, in part  
356 by promoting TCS-mediated production of c-di-GMP (Figs. 3 and 6) (48-51).

357 One factor that promotes persistence of environmental *L. pneumophila* is secretion of the  
358 pigment pyomelanin, which occurs in late PE phase. Derived from polymerization of  
359 homogentisic acid (HGA), this soluble pigment not only protects *L. pneumophila* from the  
360 damaging effects of light (42), but it also possesses ferric reductase activity that contributes to  
361 iron uptake (43). A second factor that increases environmental persistence of *L. pneumophila* is  
362 poly-3-hydroxybutyrate (PHB). To generate a reserve energy source, *L. pneumophila* increases  
363 production of PHB lipid granules at the transition to PE phase (44, 45). Formation of this energy  
364 store involves multiple enzymatic steps, and *L. pneumophila* encodes multiple PHB biosynthesis  
365 genes. The Lpg0278/Lpg0277 TCS equips *L. pneumophila* to respond to nutrient deprivation by  
366 supporting robust PHB accumulation (Fig. 6A); however, additional regulators likely contribute  
367 to the process, since *L. pneumophila* that lack the RR still generate some PHB, as judged by Nile  
368 Red fluorescence (Fig. 6). Future studies can identify the mechanism of TCS-mediated activation  
369 of PHB biosynthesis and the downstream effector of RR-generated c-di-GMP. Candidates for  
370 the TCS regulon include *L. pneumophila* genes induced in response to nutrient-limiting  
371 conditions (52).

372 A second messenger molecule, c-di-GMP is a wide-spread regulator of multiple bacterial  
373 physiological processes, including biofilm formation, cell cycle progression, and virulence gene  
374 expression (25, 53-55). The RR encoded by *lpg0277* is a bifunctional enzyme whose DCG and  
375 PDE domains can generate and degrade c-di-GMP production, respectively (20). When *L.*  
376 *pneumophila* Philadelphia-1 cells experience nutrient deprivation, activation of the TCS is

377 predicted to increase c-di-GMP levels, based on several genetic tests of RR function. In  
378 particular, point mutations in either the RR DGC domain (Figs. 7A and C, S2B) or  
379 phosphoacceptor site (Figs. S1, S2C) phenocopy the  $\Delta$ RR mutant (Figs. 5B and D, 6), whereas  
380 the PDE domain point mutant resembles WT (Figs. 7B and C, S2A). Our observations are  
381 consistent with the studies by Pecastings and colleagues of this locus in the *L. pneumophila* Lens  
382 strain: after 5 days culture on solid bacteriology medium, mutants lacking the homologous RR  
383 Lpl0329 contain less intracellular c-di-GMP than do WT cells (22). Thus, in non-replicating *L.*  
384 *pneumophila* cells, the DCG activity of RR Lpl0329 likely predominates. On the other hand,  
385 using proteins purified from the *L. pneumophila* Lens strain, Levet-Paulo and colleagues  
386 demonstrated that phosphorylation of the RR Lpl0329 reduced its DCG activity but left PDE  
387 activity unaltered (27). These biochemical experiments suggest that the TCS phosphorelay can  
388 decrease the local c-di-GMP level. Perhaps these differences between the *in vivo* and *in vitro*  
389 studies indicate that the enzymatic activity of RR Lpl0329 can be modulated not only through  
390 phosphorylation by its cognate HK, but also by another regulatory factor that does not co-purify  
391 with the HK or RR proteins.

392 One factor that does functionally interact with the TCS is Lpg0279, a protein that is  
393 conserved among *L. pneumophila*, abundant in MIF cells (6), and encoded on the *lpg0279-0277*  
394 mRNA (Fig. 1). Consistent with a function in MIF cells, *L. pneumophila* do not require Lpg0279  
395 to transition from E to PE phase in broth. However, constitutive expression of *lpg0279* prevents  
396 replicating WT *L. pneumophila* from differentiating to the PE transmissive form, as does loss of  
397 TCS function (Fig. 5). Moreover, genetic epistasis tests predict that the MIF protein Lpg0279  
398 acts upstream of the TCS, repressing its activity by a mechanism not yet known (Fig. 8, S3B).

399           One clue to Lpg0279 function is its F-box and Intracellular Signal Transduction (FIST)  
400 domain, first recognized in 2007 as a component of signaling pathways in diverse prokaryotic  
401 and eukaryotic species (56). In *Pseudomonas aeruginosa*, the FIST domain of protein Pa1975  
402 (NosP) senses nitric oxide and inhibits its co-cistronic HK to promote biofilm dispersal (57). In  
403 *L. pneumophila*, another nitric oxide sensor, the Haem-Nitric oxide/Oxygen binding protein  
404 Hnox1, is genetically and functionally linked to a GGDEF-EAL protein, Lpg1057; together this  
405 protein pair regulates biofilm formation (58). By analogy to these two regulators of bacterial  
406 differentiation, a model that warrants testing is that Lpg0279 negatively regulates TCS  
407 production of c-di-GMP in response to nitric oxide stress.

408           Considering our genetic data in the context of the current literature, we favor the  
409 following working model for the signal transduction pathway encoded by *lpg0279-77* (Fig. 9).  
410 When nutrients become scarce, the stationary phase sigma factor RpoS induces transcription of  
411 the *lpg0279-77* operon. As replicating *L. pneumophila* begin to transition to the PE transmissive  
412 phase, the Lpg0279 protein initially suppresses TCS production of cyclic-di-GMP. Then in  
413 response to additional stress, HK phosphorylates the RR thereby stimulating its DCG activity.  
414 An accumulation of cellular c-di-GMP promotes further progression into PE phase, production  
415 of pigment and PHB, and survival in nutrient-poor conditions.

416           This study extends the understanding of the regulatory circuit that governs the *L.*  
417 *pneumophila* life cycle. When nutrients become limiting within host cells, the stringent response  
418 alarmone ppGpp coordinates differentiation of intracellular *L. pneumophila* to a motile,  
419 infectious form equipped for transmission between host cells. The second messenger cyclic-di-  
420 GMP promotes *L. pneumophila* differentiation into a cell type equipped for persistence in  
421 nutrient poor environments. Defining c-di-GMP regulatory networks is a challenging endeavor,

422 due to the spatial and temporal sequestering of c-di-GMP signaling, as well as the multiple  
423 enzymes that contribute to c-di-GMP metabolism in *L. pneumophila* and other bacteria (25).  
424 Accordingly, this genetic analysis of the signal transduction system comprised of the Lpg0279  
425 MIF protein and the Lpg0278-Lpg0277 TCS can guide future molecular and biochemical studies  
426 to delineate how c-di-GMP promotes resilience of environmental *L. pneumophila*.

427

## 428 **MATERIALS AND METHODS**

### 429 **Bacterial strains and culture conditions**

430 The bacterial strains utilized in this study are listed in Supplementary Material **Table S1**.  
431 Except where indicated, all *L. pneumophila* strains were cultured in ACES (Sigma)-buffered  
432 yeast extract broth (pH = 6.9) supplemented with 0.1 mg/ml thymidine, 0.4 mg/ml L-cysteine,  
433 and 0.135 mg/ml ferric nitrate (AYET) or on solid medium containing AYET supplemented with  
434 15 g/L agar and 2 g/L charcoal (CYET). Chemically defined medium (CDM) was prepared as  
435 previously described (38), except that ferric pyrophosphate and either L-cysteine, L-cystine, L-  
436 methionine or L-serine were omitted where indicated. Where necessary for plasmid maintenance,  
437 media were supplemented with chloramphenicol (5 µg/ml) and/or kanamycin (10 µg/mL). All *E.*  
438 *coli* strains were cultured using Luria-Bertani (LB) broth or agar, supplemented where necessary  
439 with ampicillin (100 µg/ml), chloramphenicol (25 µg/ml) or kanamycin (25 µg/ml). To induce  
440 gene expression from the pMMB206cam plasmid, 250µM isopropyl β-D-1-  
441 thiogalactopyranoside (IPTG; Gold Biotechnology) was added to growth media.

442 Bacteria from frozen stocks were struck onto CYET plates every 1-2 weeks and incubated at  
443 37°C for ≥ 3 d until colonies developed. For experiments, colonies were inoculated into AYET  
444 and cultured overnight at 37°C on an orbital shaker to exponential (E) phase ( $OD_{600} < 2.5$ ) and

445 then subcultured in AYET for a second overnight incubation until the desired growth stage: E  
446 phase or post-exponential (PE) phase ( $OD_{600} > 3.5$ ).

447

#### 448 **Plasmids and primers**

449 All plasmids and primers utilized in this study are listed in Supplementary Material **Table S2**.

450 Plasmid *plpg0279-gfp* was constructed by amplifying the 832 bp directly 5' of the *lpg0279* ORF

451 using primers EH21 and EH43, which encode *Bam*HI and *Xba*I restriction sites, respectively.

452 After digestion, the fragment was then ligated into the GFP reporter plasmid pBH6119 5' of a

453 promoterless *gfpmut3* gene (13, 29). Plasmids pHK/RR and *plpg0279* were constructed by

454 amplifying either a 3.6 kb fragment containing *lpg0278* through *lpg0277* using primers EH69

455 and EH70 or a 1.2 kb fragment containing *lpg0279* using primers 79OE-F and 79OE-R, which

456 each encode *Bam*HI and *Hind*III restriction sites; primer 79OE-F also encodes an optimal

457 ribosome binding site (20). Following restriction enzyme digestion, the fragments were ligated

458 into the IPTG-inducible plasmid pMMB206cam. Correct placement and orientation of the insert

459 was verified by PCR and/or DNA sequencing.

460

#### 461 **Mutant strain construction**

462 The laboratory strain Lp02, a thymidine auxotroph derived from the clinical isolate

463 Philadelphia-1 (59), was utilized as the parent strain for all constructs. Deletion mutants were

464 generated by homologous recombination as previously described (60) using the primers listed in

465 **Table S2**. The genes of interest along with ~700 bp of 3' and 5' flanking DNA were amplified

466 and cloned into the vector pGEM-T Easy (Promega) to create pGEM*lpg0277*, pGEM*lpg0280*,

467 and pGEM*lpg0279*. The kanamycin cassette from pKD4 was amplified using primers comprised

468 of the oligos PO and P2 along with ~36 bp of DNA sequence homologous to the regions 3' and 5'  
469 of the each gene of interest. Following allelic exchange in the *E. coli*  $\lambda$ -red recombinase strain  
470 DY330, candidate colonies were screened by PCR and transformed into *E. coli* host strain DH5 $\alpha$ .  
471 Point mutants RR<sup>E396K</sup>, RR<sup>E521A</sup>, and RR<sup>D87N</sup> were created using the QuikChange XLII Site-  
472 Directed Mutagenesis Kit (Agilent) with plasmid pGEM*lpg0277* serving as a template and using  
473 primers sets E396K-F/E396K-R, E521A-F/E521A-R, and D87N-F/D87N-R, respectively. The  
474 recombinant alleles (*lpg0277::kan*, *lpg0278::kan* and *lpg0279::kan*) and point mutant alleles  
475 were amplified by PCR using each relevant primer pair (77del-F/77del-R, 78del-F/78del-R or  
476 79del-F/79del-R) and introduced into Lp02 by natural transformation. Where indicated in **Table**  
477 **S2**, the kanamycin cassette was subsequently excised by Flp recombinase as previously  
478 described (61). All mutations were confirmed by DNA sequencing.

479 Transformation with the plasmids identified in **Table S1** was conducted by electroporating  
480 isolated plasmid DNA (Qiagen) into 50  $\mu$ l competent cells at 1.8 kV, 100 W and 25  $\mu$ F using 1  
481 mm cuvettes. Cells were then transferred to 950  $\mu$ L AYET and incubated at 37°C for 1 h on an  
482 orbital shaker before plating on selective media. Also constructed were control strains that carry  
483 the corresponding pBH6119 or pMMB206cam empty vector.

484

## 485 **RNA isolation**

486 To isolate RNA for analysis, 0.5-1.0 ml of bacterial culture at OD<sub>600</sub> > 3.0 was collected by  
487 centrifugation at 12,000 x g. The pellet was resuspended in an equal volume of TRIzol reagent  
488 and then purified using the Direct-zol RNA MiniPrep kit (Zymo Research). All RNA  
489 preparations were treated with DNase I Amplification Grade or Turbo DNA-free (Invitrogen),  
490 and absence of genomic DNA was confirmed by PCR and gel electrophoresis.

491

## 492 **End-point PCR experiments**

493 To determine whether *lpg0279*, *lpg0278*, and *lpg0277* are co-transcribed, 800 ng of purified  
494 RNA was used as a template to generate cDNA with the iScript cDNA Synthesis Kit (Bio-Rad).  
495 End-point PCR was then conducted using primer sets EH13/EH14 and EH1/EH2, which span the  
496 *lpg0279-lpg0278* and *lpg0278-lpg0277* intragenic regions, respectively. For the end-point PCR  
497 experiment examining co-transcription of *lpg0280* and *lpg0279*, cDNA synthesis was coupled  
498 with PCR amplification using 800 ng RNA, primer set EH55/56, and the SuperScript III One-  
499 Step RT-PCR System with Platinum *Taq* DNA Polymerase (Invitrogen). For all experiments,  
500 genomic DNA was used as a positive control, and reactions omitting the reverse transcriptase  
501 enzyme served as a negative control.

502

## 503 **Growth curves**

504 Bacterial growth kinetics were analyzed by culturing *L. pneumophila* to E or PE phase as  
505 indicated, then collecting 1 ml aliquots by centrifugation at 5,000 x g for 5 minutes. The pellet  
506 was resuspended to an OD<sub>600</sub> of 0.1 in 1 ml fresh AYET supplemented with chloramphenicol and  
507 IPTG, and 250 µl aliquots were dispensed into triplicate wells of a sterile 100x Honeycomb Plate  
508 (Fisher Scientific). The plates were transferred to a Bioscreen C plate reader and incubated for 36  
509 h at 37°C with continuous shaking, with OD<sub>600</sub> measurements taken at 3 h intervals.

510

## 511 **Pigmentation**

512 To analyze pigment production, strains were cultured as described above to PE phase and  
513 then incubated at 37°C for an additional 1-3 days. Next, 0.5 ml samples were centrifuged at

514 16,000 x g for 5 min, 200  $\mu$ l aliquots of each supernatant were placed in a 96-well plate, and then  
515 their absorbance at OD<sub>550</sub> was quantified on a plate reader. To normalize pigment values to cell  
516 density, each cell pellet was resuspended in PBS to its original volume, and then the OD<sub>600</sub> of  
517 100  $\mu$ l aliquots was quantified on a plate reader. All measurements were performed in duplicate.

518

### 519 **GFP transcriptional reporter experiments**

520 To analyze activity of the *lpg0279-0277* promoter, strains EH224, EH97 and EH102 which  
521 each harbor plasmid *p<sub>lpg0279-gfp</sub>* were cultured overnight to E phase, and then diluted to an  
522 OD<sub>600</sub> of 0.4-0.8 in either AYET or CDM that lacked L-cysteine, L-serine or L-methionine, as  
523 indicated. The AYET and CDM bacterial suspensions were supplemented aseptically with 0.135  
524 mg/ml ferric nitrate and/or 2.27 mM, 1.14 mM or 0.7 mM L-cysteine, as indicated. All cultures  
525 were then further incubated at 37°C for 10-12 h on an orbital shaker. Measurements were taken  
526 at 2-3 h intervals by centrifuging 800  $\mu$ l aliquots, resuspending the pellet in an equal volume of  
527 PBS, and quantifying fluorescence of triplicate 200  $\mu$ l samples at 485<sub>EX</sub>/528<sub>EM</sub> on a Biotek plate  
528 reader. To normalize all fluorescence readings to cell density, the OD<sub>600</sub> of a 1/10 dilution of  
529 each cell suspension was quantified with a spectrophotometer.

530

### 531 **PHB measurement by Nile Red staining**

532 To analyze intracellular lipid (PHB) content, 4-6 ml aliquots of E phase cultures were first  
533 collected by centrifugation (5 min at 5,000 x g) and the cell pellets resuspended in an equal  
534 volume of CDM supplemented with thymidine (0.1 mg/ml), chloramphenicol (25  $\mu$ g/ml), and  
535 IPTG (250  $\mu$ M), but lacking L-cysteine and L-cystine. Cultures were then incubated for 24 h at  
536 37°C on an orbital shaker. PHB content was quantified for the initial E phase cultures and again



537 following the 24 h incubation using the fluorescent dye Nile Red (Invitrogen) as described (45),  
538 with the following modifications. Briefly, aliquots of bacterial cultures were collected by  
539 centrifugation and resuspended in an equal volume of deionized water before fixing the cells  
540 with 1% (v/v) formaldehyde at room temperature for 30 min. After washing to remove the  
541 formaldehyde, cell density was adjusted to OD<sub>600</sub> 0.5 in 1 ml of deionized water, and the cells  
542 were stained by adding 1 µl of a 25 mM Nile Red stock solution suspended in DMSO. The cells  
543 were incubated at room temperature in the dark for 1 h, and then 200 µl aliquots were measured  
544 in triplicate on a Biotek plate reader at 545<sub>EX</sub>/600<sub>EM</sub>.

545

#### 546 **Survival assay**

547 To assess long-term survival of *L. pneumophila* in the absence of L-cysteine, cultures  
548 prepared as for PHB measurement described above were incubated at 37°C on an orbital shaker  
549 for 7 days. At the times indicated, duplicate samples were removed, serially diluted, and plated  
550 to enumerate CFUs on CYET.

551

#### 552 **ACKNOWLEDGEMENTS**

553 This work was supported by the Michigan Predoctoral Genetics Training Program (NIH T32-  
554 GM-007544; E.D.H.), a University of Michigan Rackham Graduate Student Research Grant  
555 (E.D.H.), and the Endowment for Basic Sciences at the University of Michigan Medical School  
556 (M.S.S.).

557

558

#### **REFERENCES**

559

- 560 1. Declerck P. 2010. Biofilms: the environmental playground of *Legionella pneumophila*.  
561 Environ Microbiol 12:557-66.

- 562 2. Bruggemann H, Hagman A, Jules M, Sismeiro O, Dillies MA, Gouyette C, Kunst F,  
563 Steinert M, Heuner K, Coppee JY, Buchrieser C. 2006. Virulence strategies for infecting  
564 phagocytes deduced from the *in vivo* transcriptional program of *Legionella pneumophila*.  
565 Cell Microbiol 8:1228-40.
- 566 3. Oliva G, Sahr T, Buchrieser C. 2018. The life cycle of *L. pneumophila*: cellular  
567 differentiation is linked to virulence and metabolism. Front Cell Infect Microbiol 8:3.
- 568 4. Molofsky AB, Swanson MS. 2004. Differentiate to thrive: lessons from the *Legionella*  
569 *pneumophila* life cycle. Mol Microbiol 53:29-40.
- 570 5. Garduno RA, Garduno E, Hiltz M, Hoffman PS. 2002. Intracellular growth of *Legionella*  
571 *pneumophila* gives rise to a differentiated form dissimilar to stationary-phase forms.  
572 Infect Immun 70:6273-83.
- 573 6. Abdelhady H, Garduno RA. 2013. The progeny of *Legionella pneumophila* in human  
574 macrophages shows unique developmental traits. FEMS Microbiol Lett 349:99-107.
- 575 7. Pine L, George JR, Reeves MW, Harrell WK. 1979. Development of a chemically  
576 defined liquid medium for growth of *Legionella pneumophila*. J Clin Microbiol 9:615-26.
- 577 8. George JR, Pine L, Reeves MW, Harrell WK. 1980. Amino acid requirements of  
578 *Legionella pneumophila*. J Clin Microbiol 11:286-91.
- 579 9. Byrne B, Swanson MS. 1998. Expression of *Legionella pneumophila* virulence traits in  
580 response to growth conditions. Infect Immun 66:3029-34.
- 581 10. Robertson P, Abdelhady H, Garduno RA. 2014. The many forms of a pleomorphic  
582 bacterial pathogen-the developmental network of *Legionella pneumophila*. Front  
583 Microbiol 5:670.
- 584 11. Abbott ZD, Yakhnin H, Babitzke P, Swanson MS. 2015. CsrR, a paralog and direct target  
585 of CsrA, promotes *Legionella pneumophila* resilience in water. MBio 6:e00595.
- 586 12. Sahr T, Rusniok C, Impens F, Oliva G, Sismeiro O, Coppee JY, Buchrieser C. 2017. The  
587 *Legionella pneumophila* genome evolved to accommodate multiple regulatory  
588 mechanisms controlled by the CsrA-system. PLoS Genet 13:e1006629.
- 589 13. Hammer BK, Swanson MS. 1999. Co-ordination of *Legionella pneumophila* virulence  
590 with entry into stationary phase by ppGpp. Mol Microbiol 33:721-31.
- 591 14. Hammer BK, Tateda ES, Swanson MS. 2002. A two-component regulator induces the  
592 transmission phenotype of stationary-phase *Legionella pneumophila*. Mol Microbiol  
593 44:107-18.
- 594 15. Sahr T, Bruggemann H, Jules M, Lomma M, Albert-Weissenberger C, Cazalet C,  
595 Buchrieser C. 2009. Two small ncRNAs jointly govern virulence and transmission in  
596 *Legionella pneumophila*. Mol Microbiol 72:741-62.
- 597 16. Edwards RL, Jules M, Sahr T, Buchrieser C, Swanson MS. 2010. The *Legionella*  
598 *pneumophila* LetA/LetS two-component system exhibits rheostat-like behavior. Infect  
599 Immun 78:2571-83.
- 600 17. Simm R, Morr M, Kader A, Nimtze M, Romling U. 2004. GGDEF and EAL domains  
601 inversely regulate cyclic di-GMP levels and transition from sessility to motility. Mol  
602 Microbiol 53:1123-34.
- 603 18. Tchigvintsev A, Xu X, Singer A, Chang C, Brown G, Proudfoot M, Cui H, Flick R,  
604 Anderson WF, Joachimiak A, Galperin MY, Savchenko A, Yakunin AF. 2010. Structural  
605 insight into the mechanism of c-di-GMP hydrolysis by EAL domain phosphodiesterases.  
606 J Mol Biol 402:524-38.

- 607 19. Tamayo R, Pratt JT, Camilli A. 2007. Roles of cyclic diguanylate in the regulation of  
608 bacterial pathogenesis. *Annu Rev Microbiol* 61:131-148.
- 609 20. Levi A, Folcher M, Jenal U, Shuman HA. 2011. Cyclic diguanylate signaling proteins  
610 control intracellular growth of *Legionella pneumophila*. *MBio* 2:e00316-10.
- 611 21. Allombert J, Lazzaroni JC, Bailo N, Gilbert C, Charpentier X, Doublet P, Vianney A.  
612 2014. Three antagonistic cyclic di-GMP-catabolizing enzymes promote differential  
613 Dot/Icm effector delivery and intracellular survival at the early steps of *Legionella*  
614 *pneumophila* infection. *Infect Immun* 82:1222-33.
- 615 22. Pecastaings S, Allombert J, Lajoie B, Doublet P, Roques C, Vianney A. 2016. New  
616 insights into *Legionella pneumophila* biofilm regulation by c-di-GMP signaling.  
617 *Biofouling* 32:935-48.
- 618 23. Stock AM, Robinson VL, Goudreau PN. 2000. Two-component signal transduction.  
619 *Annu Rev Biochem* 69:183-215.
- 620 24. Zschiedrich CP, Keidel V, Szurmant H. 2016. Molecular mechanisms of two-component  
621 signal transduction. *J Mol Biol* 428:3752-75.
- 622 25. Romling U, Galperin MY, Gomelsky M. 2013. Cyclic di-GMP: the first 25 years of a  
623 universal bacterial second messenger. *Microbiol Mol Biol Rev* 77:1-52.
- 624 26. Tao J, Li C, Luo C, He C. 2014. RavA/RavR two-component system regulates  
625 *Xanthomonas campestris* pathogenesis and c-di-GMP turnover. *FEMS Microbiol Lett*  
626 358:81-90.
- 627 27. Levet-Paulo M, Lazzaroni JC, Gilbert C, Atlan D, Doublet P, Vianney A. 2011. The  
628 atypical two-component sensor kinase Lpl0330 from *Legionella pneumophila* controls  
629 the bifunctional diguanylate cyclase-phosphodiesterase Lpl0329 to modulate bis-(3'-5')-  
630 cyclic dimeric GMP synthesis. *J Biol Chem* 286:31136-44.
- 631 28. Osbourn AE, Field B. 2009. Operons. *Cell Mol Life Sci* 66:3755-75.
- 632 29. Cormack BP, Valdivia RH, Falkow S. 1996. FACS-optimized mutants of the green  
633 fluorescent protein (GFP). *Gene* 173:33-8.
- 634 30. Abu-Zant A, Asare R, Graham JE, Abu Kwaik Y. 2006. Role for RpoS but not RelA of  
635 *Legionella pneumophila* in modulation of phagosome biogenesis and adaptation to the  
636 phagosomal microenvironment. *Infect Immun* 74:3021-6.
- 637 31. Rasis M, Segal G. 2009. The LetA-RsmYZ-CsrA regulatory cascade, together with RpoS  
638 and PmrA, post-transcriptionally regulates stationary phase activation of *Legionella*  
639 *pneumophila* Icm/Dot effectors. *Mol Microbiol* 72:995-1010.
- 640 32. Albert-Weissenberger C, Sahr T, Sismeiro O, Hacker J, Heuner K, Buchrieser C. 2010.  
641 Control of flagellar gene regulation in *Legionella pneumophila* and its relation to growth  
642 phase. *J Bacteriol* 192:446-55.
- 643 33. Appelt S, Heuner K. 2017. The flagellar regulon of *Legionella*-a review. *Front Cell Infect*  
644 *Microbiol* 7:454.
- 645 34. Bachman MA, Swanson MS. 2001. RpoS co-operates with other factors to induce  
646 *Legionella pneumophila* virulence in the stationary phase. *Mol Microbiol* 40:1201-14.
- 647 35. Lange R, Hengge-Aronis R. 1991. Identification of a central regulator of stationary-phase  
648 gene expression in *Escherichia coli*. *Mol Microbiol* 5:49-59.
- 649 36. Chiang SM, Schellhorn HE. 2010. Evolution of the RpoS regulon: origin of RpoS and the  
650 conservation of RpoS-dependent regulation in bacteria. *J Mol Evol* 70:557-71.
- 651 37. Dong T, Schellhorn HE. 2010. Role of RpoS in virulence of pathogens. *Infect Immun*  
652 78:887-97.

- 653 38. Warren WJ, Miller RD. 1979. Growth of Legionnaires disease bacterium (*Legionella*  
654 *pneumophila*) in chemically defined medium. J Clin Microbiol 10:50-5.
- 655 39. Ewann F, Hoffman PS. 2006. Cysteine metabolism in *Legionella pneumophila*:  
656 characterization of an L-cystine-utilizing mutant. Appl Environ Microbiol 72:3993-4000.
- 657 40. Zusman T, Gal-Mor O, Segal G. 2002. Characterization of a *Legionella pneumophila*  
658 *relA* insertion mutant and roles of RelA and RpoS in virulence gene expression. J  
659 Bacteriol 184:67-75.
- 660 41. Bachman MA, Swanson MS. 2004. The LetE protein enhances expression of multiple  
661 LetA/LetS-dependent transmission traits by *Legionella pneumophila*. Infect Immun  
662 72:3284-93.
- 663 42. Steinert M, Engelhard H, Flugel M, Wintermeyer E, Hacker J. 1995. The Lly protein  
664 protects *Legionella pneumophila* from light but does not directly influence its  
665 intracellular survival in *Hartmannella vermiformis*. Appl Environ Microbiol 61:2428-  
666 2430.
- 667 43. Chatfield CH, Cianciotto NP. 2007. The secreted pyomelanin pigment of *Legionella*  
668 *pneumophila* confers ferric reductase activity. Infect Immun 75:4062-70.
- 669 44. Gillmaier N, Schunder E, Kutzner E, Tlapak H, Rydzewski K, Herrmann V, Stammler M,  
670 Lasch P, Eisenreich W, Heuner K. 2016. Growth-related metabolism of the carbon  
671 storage poly-3-hydroxybutyrate in *Legionella pneumophila*. J Biol Chem 291:6471-82.
- 672 45. James BW, Mauchline WS, Dennis PJ, Keevil CW, Wait R. 1999. Poly-3-  
673 hydroxybutyrate in *Legionella pneumophila*, an energy source for survival in low-  
674 nutrient environments. Appl Environ Microbiol 65:822-7.
- 675 46. Greenspan P. 1985. Nile red: a selective fluorescent stain for intracellular lipid droplets.  
676 Cell Bio 100:965-973.
- 677 47. Edwards RL, Dalebroux ZD, Swanson MS. 2009. *Legionella pneumophila* couples fatty  
678 acid flux to microbial differentiation and virulence. Mol Microbiol 71:1190-1204.
- 679 48. Trigui H, Dudyk P, Oh J, Hong JI, Faucher SP. 2015. A regulatory feedback loop  
680 between RpoS and SpoT supports the survival of *Legionella pneumophila* in water. Appl  
681 Environ Microbiol 81:918-28.
- 682 49. Skaliy P, McEachern HV. 1979. Survival of the Legionnaires' disease bacterium in water.  
683 Ann Intern Med 90:662-3.
- 684 50. Paszko-Kolva C, Shahamat M, Colwell RR. 1992. Long-term survival of *Legionella*  
685 *pneumophila* serogroup 1 under low-nutrient conditions and associated morphological  
686 changes. FEMS Microbiol Ecol 11:45-55.
- 687 51. Mendis N, McBride P, Faucher SP. 2015. Short-term and long-term survival and  
688 virulence of *Legionella pneumophila* in the defined freshwater medium Fraquil. PLoS  
689 One 10:e0139277.
- 690 52. Li L, Mendis N, Trigui H, Faucher SP. 2015. Transcriptomic changes of *Legionella*  
691 *pneumophila* in water. BMC Genomics 16:637.
- 692 53. Duerig A, Abel S, Folcher M, Nicollier M, Schwede T, Amiot N, Giese B, Jenal U. 2009.  
693 Second messenger-mediated spatiotemporal control of protein degradation regulates  
694 bacterial cell cycle progression. Genes Dev 23:93-104.
- 695 54. He M, Zhang JJ, Ye M, Lou Y, Yang XF. 2014. Cyclic di-GMP receptor PlzA controls  
696 virulence gene expression through RpoS in *Borrelia burgdorferi*. Infect Immun 82:445-  
697 52.

- 698 55. Conner JG, Zamorano-Sanchez D, Park JH, Sondermann H, Yildiz FH. 2017. The ins and  
699 outs of cyclic di-GMP signaling in *Vibrio cholerae*. *Curr Opin Microbiol* 36:20-29.
- 700 56. Borziak K, Zhulin IB. 2007. FIST: a sensory domain for diverse signal transduction  
701 pathways in prokaryotes and ubiquitin signaling in eukaryotes. *Bioinformatics* 23:2518-  
702 21.
- 703 57. Hossain S, Boon EM. 2017. Discovery of a novel nitric oxide binding protein and nitric-  
704 oxide-responsive signaling pathway in *Pseudomonas aeruginosa*. *ACS Infect Dis* 3:454-  
705 461.
- 706 58. Carlson HK, Vance RE, Marletta MA. 2010. H-NOX regulation of c-di-GMP metabolism  
707 and biofilm formation in *Legionella pneumophila*. *Mol Microbiol* 77:930-42.
- 708 59. Rao C, Benhabib H, Ensminger AW. 2013. Phylogenetic reconstruction of the *Legionella*  
709 *pneumophila* Philadelphia-1 laboratory strains through comparative genomics. *PLoS One*  
710 8:e64129.
- 711 60. Bryan A, Abbott ZD, Swanson MS. 2013. Constructing unmarked gene deletions in  
712 *Legionella pneumophila*. *Methods Mol Biol* 954:197-212.
- 713 61. Bryan A, Harada K, Swanson MS. 2011. Efficient generation of unmarked deletions in  
714 *Legionella pneumophila*. *Appl Environ Microbiol* 77:2545-8.
- 715 62. Yu D, Ellis HM, Lee EC, Jenkins NA, Copeland NG, Court DL. 2000. An efficient  
716 recombination system for chromosome engineering in *Escherichia coli*. *Proc Natl Acad*  
717 *Sci U S A* 97:5978-83.
- 718 63. Berger KH, Isberg RR. 1993. Two distinct defects in intracellular growth complemented  
719 by a single genetic locus in *Legionella pneumophila*. *Mol Microbiol* 7:7-19.
- 720 64. Dalebroux ZD, Edwards RL, Swanson MS. 2009. SpoT governs *Legionella pneumophila*  
721 differentiation in host macrophages. *Mol Microbiol* 71:640-58.
- 722 65. Molofsky AB, Swanson MS. 2003. *Legionella pneumophila* CsrA is a pivotal repressor  
723 of transmission traits and activator of replication. *Mol Microbiol* 50:445-61.
- 724 66. Datsenko KA, Wanner BL. 2000. One-step inactivation of chromosomal genes in  
725 *Escherichia coli* K-12 using PCR products. *Proc Natl Acad Sci U S A* 97:6640-5.  
726



727 FIGURES

728 Figure 1

729

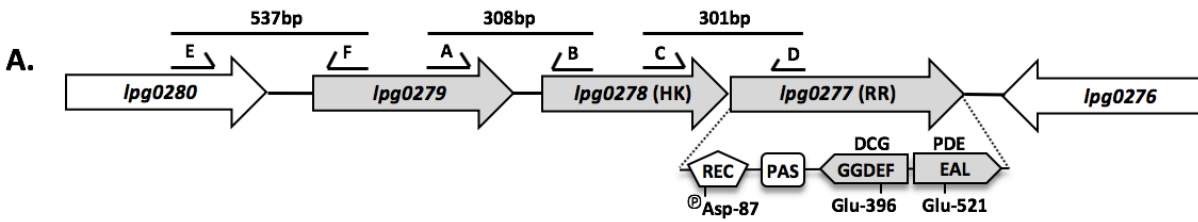

730

**B.**

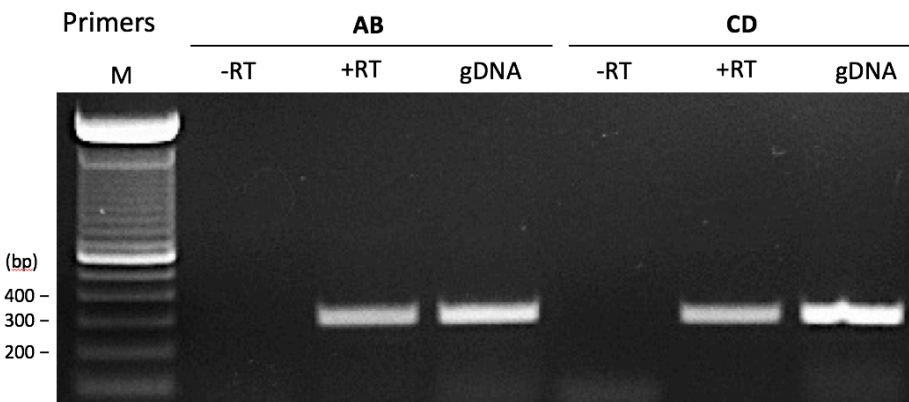

731

732

**C.**

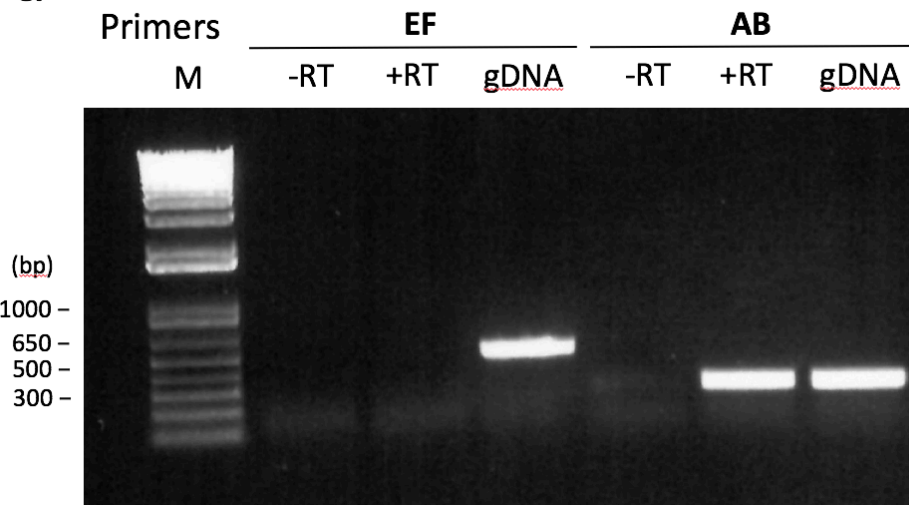

733

734

735 **Fig. 1. The genes *lpg0279*, *lpg0278* and *lpg0277* constitute an operon. (A)** Schematic of the locus containing

736 *lpg0279*, the TCS-encoding genes *lpg0278* and *lpg0277*, and the primer sets used to characterize mRNA by PCR.

737 Also shown are the genes located 5' and 3' of the *lpg0279-2077* locus. Co-transcription of (B) *lpg0279*, *lpg0278* and

738 *lpg0277* and (C) *lpg0280* and *lpg0279* and, as a positive control, *lpg0279* and *lpg0278* was assessed by end-point

739 PCR assay with or without reverse transcriptase (RT) using RNA isolated from PE phase WT *L. pneumophila* that

740 was converted to cDNA. As a reference for the PCR product length expected for each primer pair, genomic DNA

741 (gDNA) was also used as a template. M: DNA size marker.

742 **Figure 2**  
743

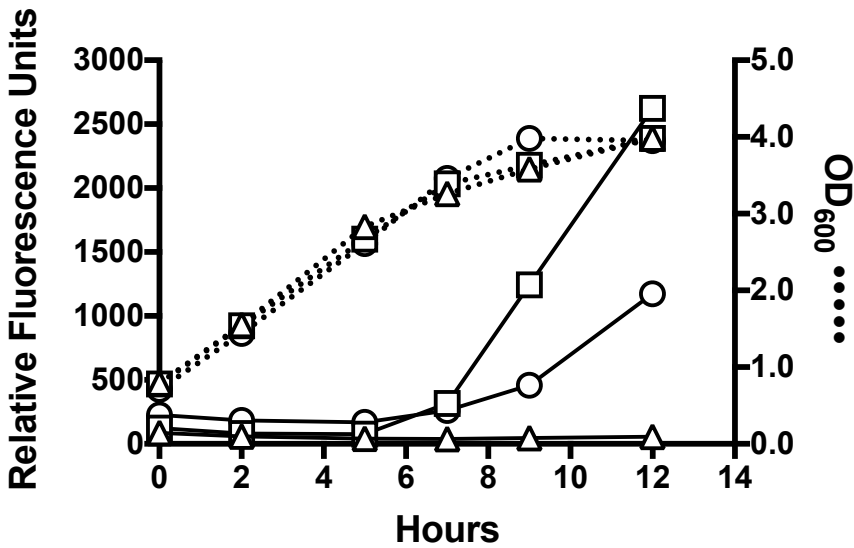

744 **Fig. 2. Promoter activity for the *lpg0279-77* operon increases upon entry into PE phase.** GFP fluorescence  
745 generated by the transcriptional reporter *p<sub>pg0279-gfp</sub>* (○). Negative control strain is Lp02 carrying the empty  
746 pBH6119 vector (Δ); PE reference strain carries the flagellin subunit reporter *p<sub>flaA-gfp</sub>* (□). For all strains,  
747 overnight E phase cultures were diluted to a starting OD<sub>600</sub> of 0.8, incubated at 37°C, and then their fluorescence  
748 was measured at 2-3 h intervals. Relative Fluorescence Units (solid lines) was calculated as Fluorescence  
749 Units/OD<sub>600</sub> (dotted lines) and represent the means ± SE of triplicate samples. In each case, error < 5%. Data shown  
750 are representative of results obtained in at least three independent experiments.  
751  
752  
753  
754

755 **Figure 3**  
756

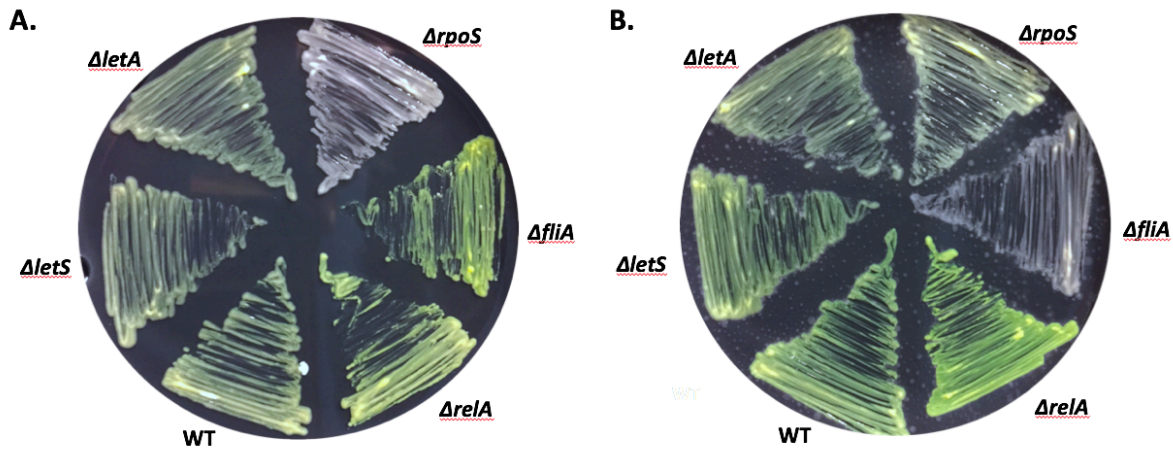

757  
758  
759  
760 **Fig. 3. Expression of *lpg0279-77* is RpoS-dependent.** Images obtained in ambient light of WT Lp02 and *letA*, *letS*,  
761 *relA*, *rpoS* and *fliA* mutants harboring the transcriptional reporter plasmids (A) *p<sub>lpg0279-gfp</sub>* or (B) *p<sub>flaA-gfp</sub>*, which  
762 serves as a reference for PE phase gene expression. The strains indicated were cultured on CYET at 37°C for 3 days  
763 to allow for bacterial growth and GFP accumulation.  
764  
765



766 **Figure 4**

**A.**

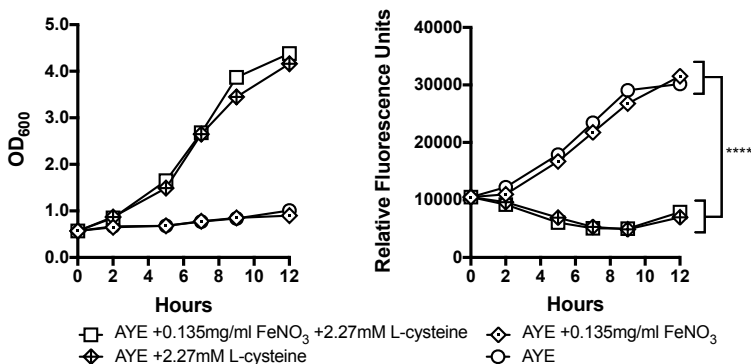

767

**B.**

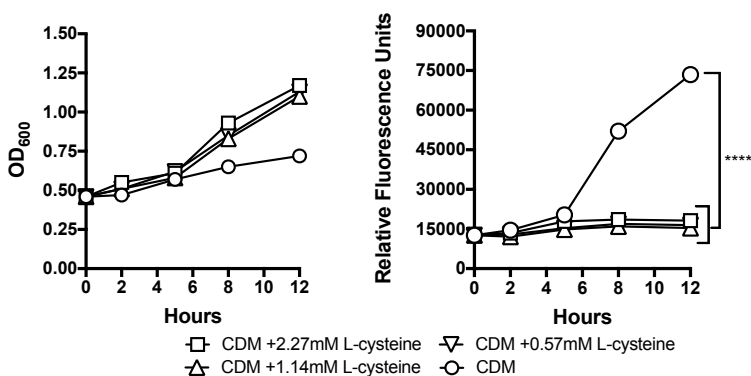

768

**C.**

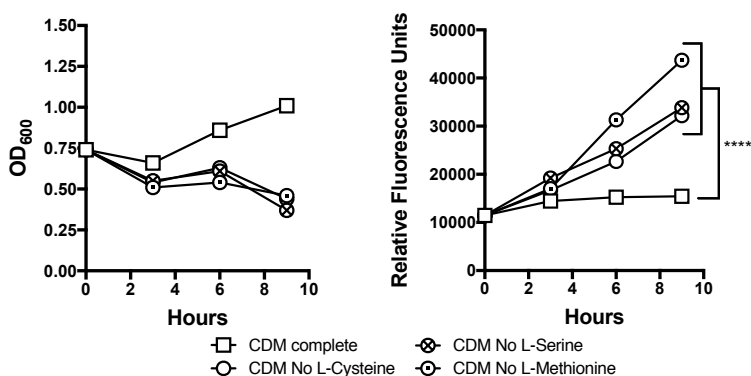

769

770

771

772

773

774

775

776

777

778

779

780

781

**Fig. 4. Nutrient limitation induces expression of *lpg0279-77*.** To examine the impact of nutrient limitation on *lpg0279-77* transcription, E phase Lp02 cultures carrying the *plpg0279-gfp* reporter plasmid were exposed to culture conditions shown and incubated for 9-12 h at 37°C on an orbital shaker, with GFP fluorescence and cell density (OD<sub>600</sub>) measured at 2-3 h intervals. (A) OD<sub>600</sub> measurements and RFU values obtained for cultures exposed to AYE medium with or without 0.135 mg/ml ferric nitrate and/or 2.27 mM L-cysteine. (B) OD<sub>600</sub> measurements and RFU values obtained for cultures exposed to CDM without or with the indicated concentration of L-cysteine. (C) OD<sub>600</sub> and RFU values obtained for cultures exposed to CDM with or without either L-cysteine, L-methionine, or L-serine. RFU symbols represent the means ± SE of triplicate GFP fluorescence readings, normalized to OD<sub>600</sub> values obtained by measuring a 1/10 dilution of cell culture in a spectrophotometer (short error bars are masked by symbols). A two-tailed Student's *t*-test was used to determine statistically significant differences between groups at 12 h (\*\*\*\*, *p* < 0.0001). Data shown are representative of results obtained in two or more independent experiments.

782 **Figure 5**  
783

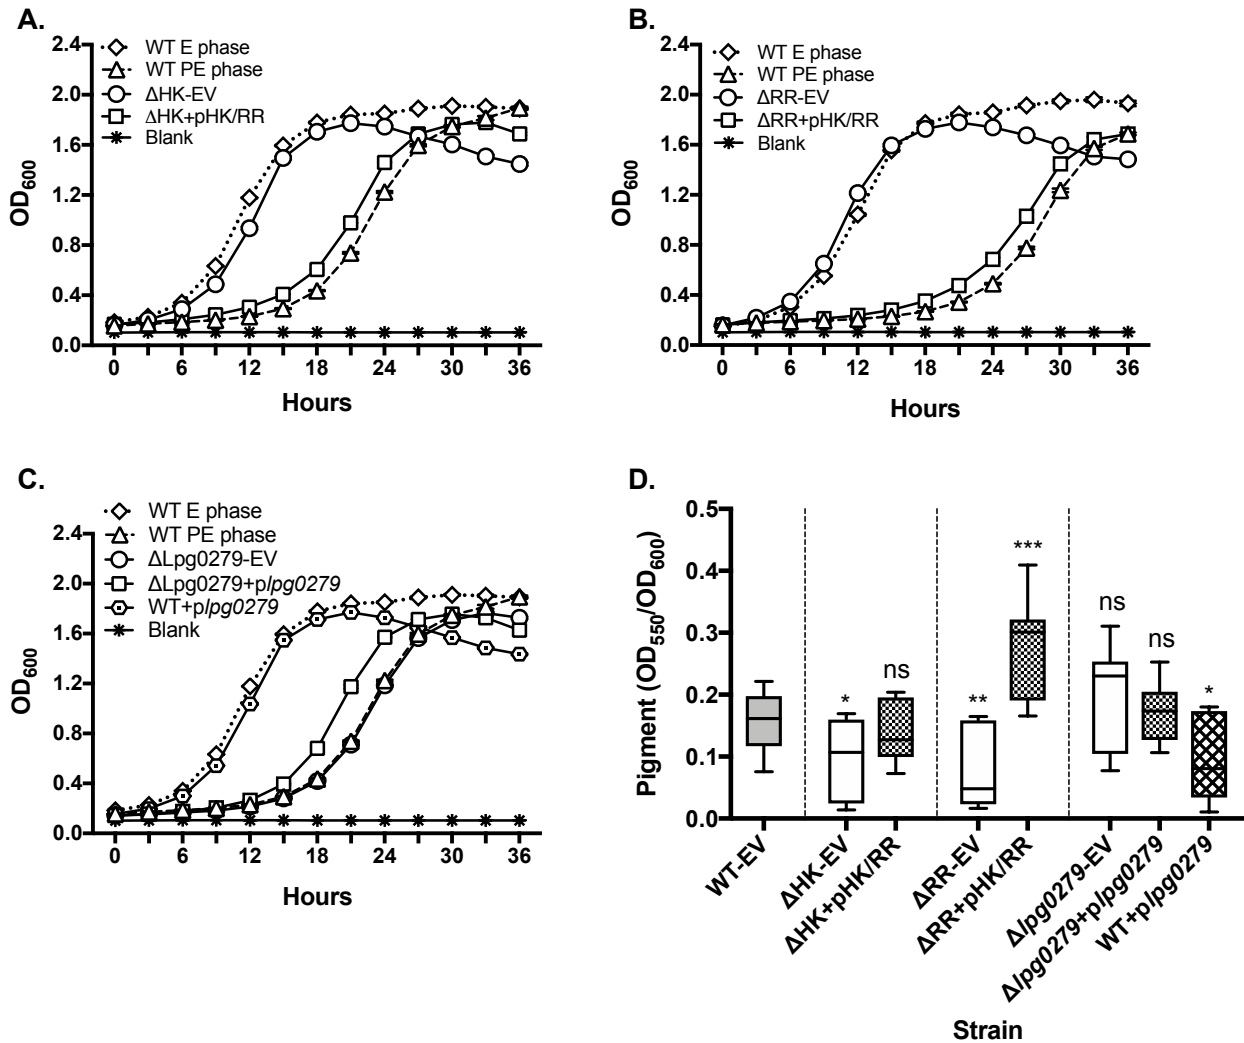

784 **Fig. 5. *L. pneumophila* lacking a complete TCS or ectopically expressing *lpg0279* resemble WT E phase**  
785 **cells.**  
786

787 The growth kinetics of WT *L. pneumophila* inocula in E phase (dotted lines) or PE phase (dashed lines) was  
788 compared to PE phase inocula of (A) an  $\Delta$ HK mutant and its complement, (B) an  $\Delta$ RR mutant and its  
789 complement, and (C) an  $\Delta$ lpg0279 mutant and its complement, together with a WT strain of *L. pneumophila*  
790 constitutively expressing *lpg0279*. With the exception of the WT E phase reference culture ( $OD_{600} < 2.0$ ), all  
791 strains were cultured overnight in AYET medium to  $OD_{600} > 3.5$  (corresponding to WT PE phase cultures), then  
792 diluted to a starting  $OD_{600}$  of  $\sim 0.1$  and incubated for 36 h in a Bioscreen growth curve analyzer set at 37°C with  
793 continuous shaking;  $OD_{600}$  measurements were obtained at 3 h intervals. Shown are means  $\pm$  SE of triplicate  
794 samples, and data shown are representative of three independent experiments. (D) Pigment accumulation in late  
795 PE phase cultures of  $\Delta$ HK,  $\Delta$ RR and  $\Delta$ lpg0279 mutants and the corresponding complemented strains, and of WT  
796 *L. pneumophila* constitutively expressing *lpg0279*. Supernatants of broth cultures maintained in PE phase for 1  
797 or 3 days were collected by centrifugation, their absorbance at  $OD_{550}$  quantified and then normalized to cell  
798 density ( $OD_{600}$ ). Results shown are the means  $\pm$  SE of pooled data from three independent experiments, with  
799 duplicate readings obtained for each measurement. A two-tailed Student's *t*-test was used to determine  
800 statistically significant differences in pigmentation compared to WT-EV (ns: not significant; \*,  $p < 0.05$ ; \*\*,  $p <$   
801  $0.01$ ; \*\*\*,  $p < 0.001$ ). EV: strain harbors the pMMB206cam empty vector.  
802

803 **Figure 6**  
804

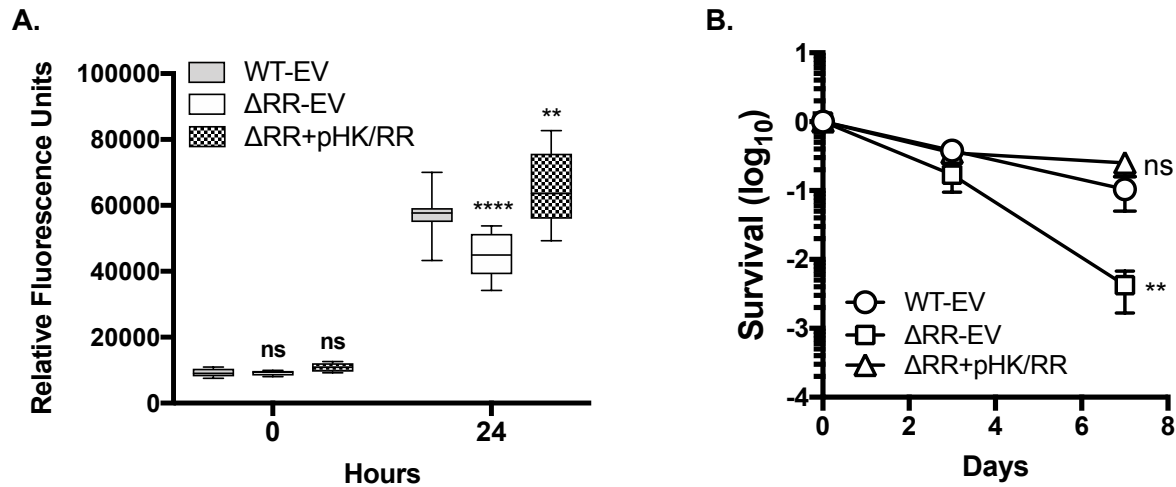

805  
806  
807 **Fig. 6. The TCS promotes PHB production and long-term viability.** E phase cultures of WT *L. pneumophila*,  
808 the ΔRR mutant, and the ΔRR complemented strain harboring pHK/RR were collected by centrifugation,  
809 resuspended in CDM lacking L-cysteine, and incubated at 37°C on an orbital shaker for up to 7 d. (A)  
810 Quantification of PHB content before and after 24 h CDM exposure. Results shown are the means ± SE of pooled  
811 data obtained from triplicate samples in four independent experiments. A two-tailed Student's *t*-test was used to  
812 determine statistically significant differences in fluorescence compared to WT-EV (ns: no significance; \*\*, *p* < 0.01;  
813 \*\*\*\*, *p* < 0.0001). (B) Survival was quantified by plating serial dilutions of the cultures indicated and enumerating  
814 CFUs before (titer) and after 3 and 7 d incubation. Shown are ratio of CFU(day)/CFU(titer), with symbols  
815 representing the means ± SE of pooled data obtained from duplicate samples in four independent experiments. The  
816 Mann-Whitney test was used to determine statistically significant differences in survival compared to WT-EV (ns:  
817 no significance; \*\*, *p* < 0.01). EV: strain harbors the pMMB206cam empty vector.  
818  
819

820 **Figure 7**  
821

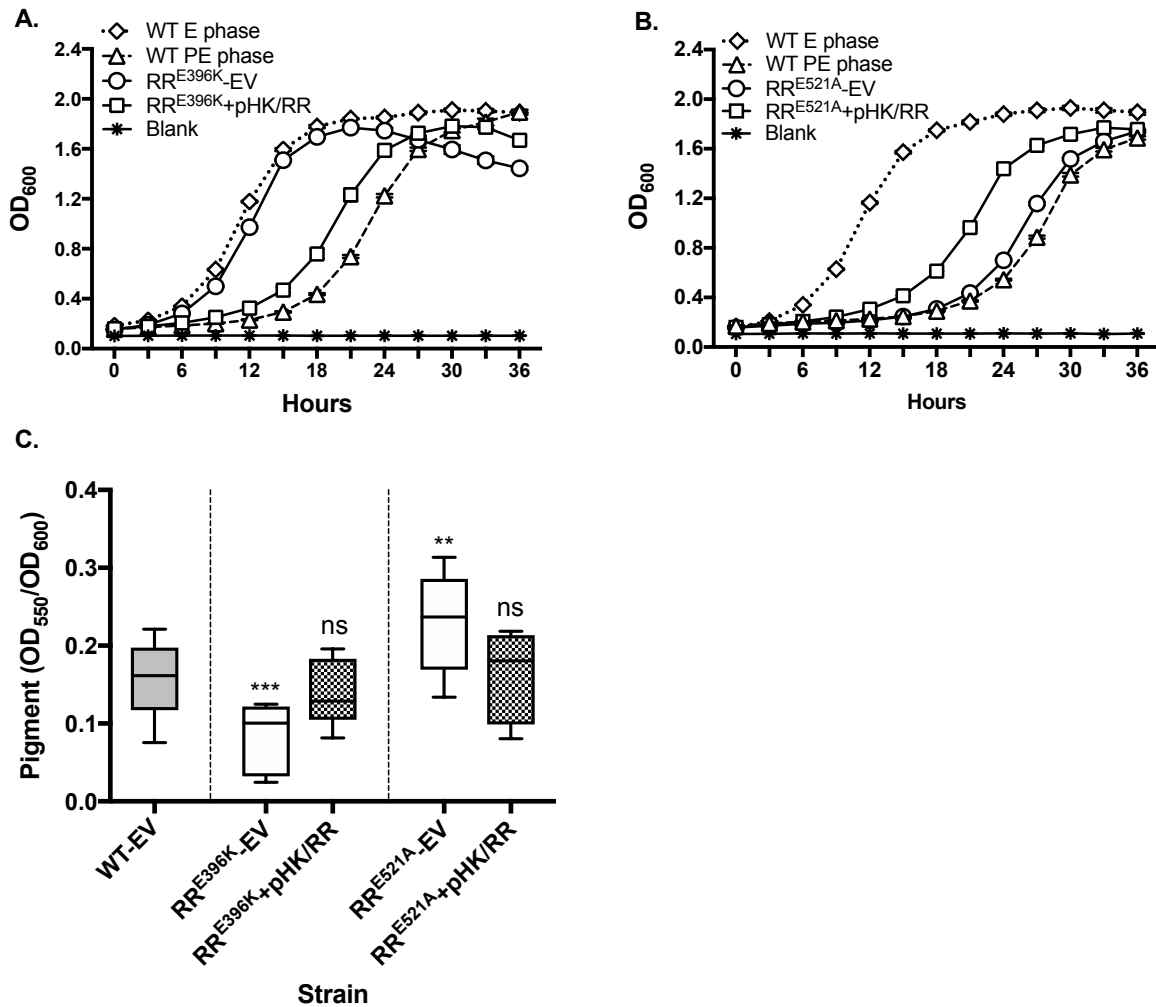

822  
823  
824  
825  
826  
827  
828  
829  
830  
831  
832  
833  
834

**Fig. 7. The DCG activity of RR Lpg0277 promotes transition to PE phase.**

Growth kinetics in AYET of WT *L. pneumophila* inocula in E (dotted lines) or PE phase (dashed lines) was compared to PE phase inocula of (A) RR<sup>E396K</sup> point mutant and (B) RR<sup>E521A</sup> point mutant strains. Symbols denote the means  $\pm$  SE of triplicate samples (short error bars are masked by symbols), and data are representative of three independent experiments. (C) Pigment accumulation by WT *L. pneumophila* after maintenance in PE phase for 1-3 days, compared with the RR<sup>E396K</sup> DGC and RR<sup>E521A</sup> PDE point mutants and their respective complemented strains. Results shown are the means  $\pm$  SE of pooled data obtained from duplicate samples in three independent experiments. A two-tailed Student's *t*-test was used to determine statistically significant differences in pigmentation compared to WT (ns: not significant; \*\* $p < 0.01$ ; \*\*\* $p < 0.001$ ). EV: strain harbors the pMMB206cam empty vector.

835 **Figure 8**  
836

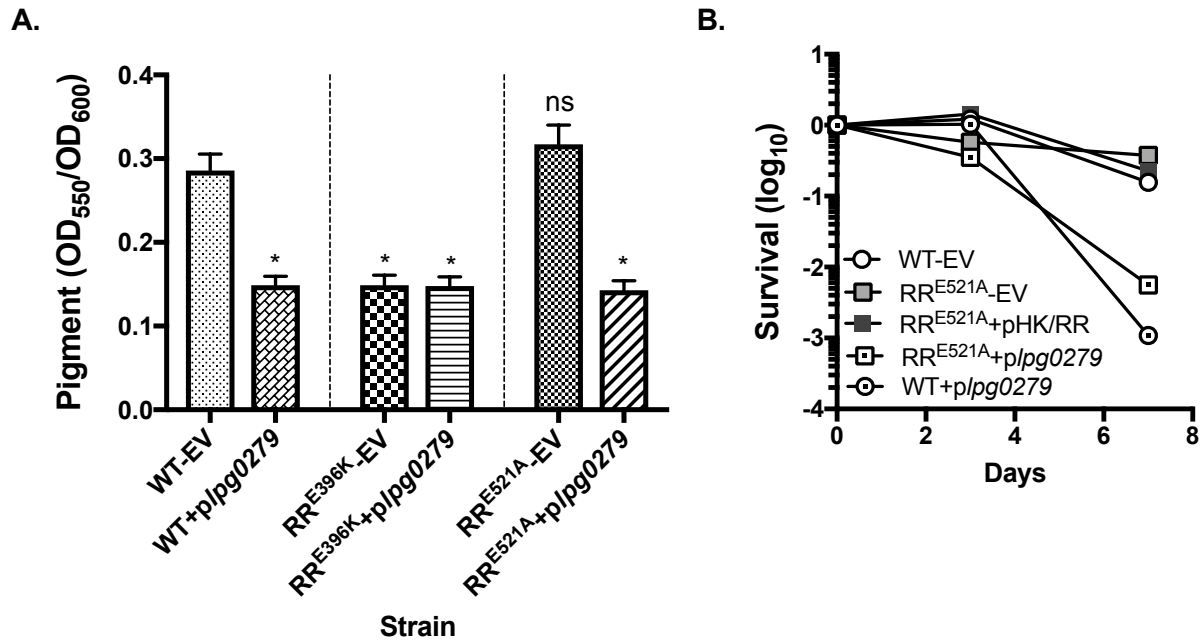

837  
838  
839 **Fig. 8. Constitutively expressed  $lpg0279$  is epistatic to RR<sup>E521A</sup> PDE mutation.**  
840 (A) Pigment accumulation by PE phase WT *L. pneumophila* and the Lpg0277 RR<sup>E396K</sup> CDG and RR<sup>E521A</sup> PDE point  
841 mutants that do or do not constitutively express p $lpg0279$ . Shown are the means  $\pm$  SE of four samples and are  
842 representative of results obtained in one other independent experiment. The Mann-Whitney test was used to  
843 determine statistically significant differences in pigmentation compared to WT (ns: not significant; \*,  $p < 0.05$ ). (B)  
844 Survival of WT *L. pneumophila* and the RR<sup>E521A</sup> PDE mutant that do or do not constitutively express p $lpg0279$  or  
845 the complementing pHK/RR plasmid. All strains were cultured in AYE to E phase, resuspended in CDM without L-  
846 cystine, and incubated at 37°C on an orbital shaker for up to 7 days. At the times shown, culture aliquots were  
847 serially diluted for CFU enumeration on CYET. Symbols shown are the ratio of CFU(day)/CFU(titer) of duplicate  
848 samples, and data is representative of results obtained in three independent experiments. EV: strain harbors the  
849 pMMB206cam empty vector.

850  
851

852 **Figure 9**  
853

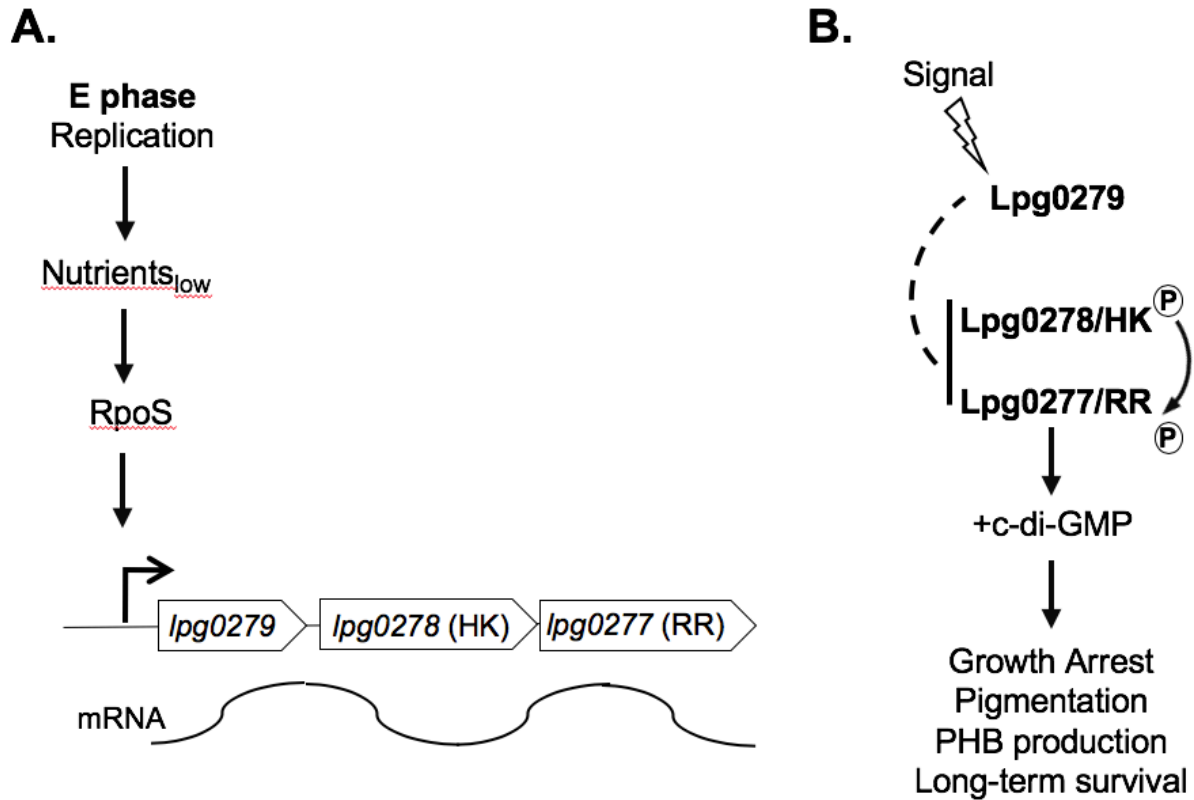

854  
855  
856 **Fig. 9. Model for *lpg0279-77* regulation of *L. pneumophila* differentiation.** (A) When amino acids become  
857 limiting, RpoS equips replicating *L. pneumophila* to induce transcription of the *lpg0279-0277* operon which encodes  
858 a putative repressor and a Two Component System. (B) Initially Lpg0279 suppresses signaling by the  
859 Lpg0278/0277 TCS. In response to prolonged environmental stress, the TCS is derepressed and HK Lpg0278  
860 phosphorylates RR Lpg0277. The DCG domain of RR Lpg0277 generates c-di-GMP, which arrests *L. pneumophila*  
861 replication, triggers production of pigment and PHB storage granules, and promotes survival in nutrient-poor  
862 environments.  
863  
864

## 865 SUPPLEMENTAL TABLES

866 Table S1. Strains used in this study

867

| Strain                       | Relevant properties                                                                                            | Source                |
|------------------------------|----------------------------------------------------------------------------------------------------------------|-----------------------|
| <b><i>E. coli</i></b>        |                                                                                                                |                       |
| DH5 $\alpha$                 | <i>supE44 <math>\Delta</math>lacU169 (80 lacZ<math>\Delta</math>M15) hsdR17 recA1 endA1 gyrA96 thi-1 relA1</i> | Laboratory collection |
| DY330                        | W3110 $\Delta$ lacU169 gal490 $\lambda$ cI857 $\Delta$ (cro-bioA)                                              | (62)                  |
| EH207                        | DH5 $\alpha$ <i>plpg0279-gfp</i>                                                                               | This work             |
| EH272                        | DH5 $\alpha$ <i>plpg0279-77</i>                                                                                | This work             |
| EH140                        | DH5 $\alpha$ <i>plpg0279</i>                                                                                   | This work             |
| <b><i>L. pneumophila</i></b> |                                                                                                                |                       |
| <b>Relevant properties</b>   |                                                                                                                |                       |
| <b>Source</b>                |                                                                                                                |                       |
| MB110                        | Lp02 wild type; <i>thyA hsdR rpsL</i> (Str <sup>r</sup> )                                                      | (63)                  |
| EH284                        | Lp02 pMMB206cam                                                                                                | This work             |
| EH286                        | Lp02 $\Delta$ lpg0277::FRT pMMB206cam                                                                          | This work             |
| EH276                        | Lp02 $\Delta$ lpg0277::FRT <i>plpg0278-77</i>                                                                  | This work             |
| EH357                        | Lp02 $\Delta$ lpg0278::FRT pMMB206cam                                                                          | This work             |
| EH352                        | Lp02 $\Delta$ lpg0278::FRT <i>plpg0278-77</i>                                                                  | This work             |
| EH350                        | Lp02 $\Delta$ lpg0279::FRT-kan-FRT pMMB206cam                                                                  | This work             |
| EH160                        | Lp02 $\Delta$ lpg0279::FRT-kan-FRT <i>plpg0279</i>                                                             | This work             |
| EH151                        | Lp02 <i>plpg0279</i>                                                                                           | This work             |
| EH344                        | Lp02 Lpg0277 <sup>E396K</sup> pMMB206cam                                                                       | This work             |
| EH311                        | Lp02 Lpg0277 <sup>E396K</sup> <i>plpg0278-77</i>                                                               | This work             |
| EH346                        | Lp02 Lpg0277 <sup>E521A</sup> pMMB206cam                                                                       | This work             |
| EH314                        | Lp02 Lpg0277 <sup>E521A</sup> <i>plpg0278-77</i>                                                               | This work             |
| EH102                        | Lp02 <i>pflaA-gfp</i>                                                                                          | This work             |
| EH224                        | Lp02 <i>plpg0279-gfp</i>                                                                                       | This work             |
| EH97                         | Lp02 pBH6119                                                                                                   | This work             |
| MB410                        | Lp02 $\Delta$ fliA::kan                                                                                        | (14)                  |
| MB443                        | Lp02 $\Delta$ rpoS::kan                                                                                        | (34)                  |
| MB696                        | Lp02 $\Delta$ relA::kan                                                                                        | (64)                  |
| MB413                        | Lp02 $\Delta$ letA::kan                                                                                        | (14)                  |
| MB416                        | Lp02 $\Delta$ letS::kan                                                                                        | (14)                  |
| EH358                        | Lp02 $\Delta$ fliA <i>plpg0279-gfp</i>                                                                         | This work             |
| EH360                        | Lp02 $\Delta$ rpoS <i>plpg0279-gfp</i>                                                                         | This work             |
| EH366                        | Lp02 $\Delta$ relA <i>plpg0279-gfp</i>                                                                         | This work             |
| EH362                        | Lp02 $\Delta$ letA <i>plpg0279-gfp</i>                                                                         | This work             |
| EH364                        | Lp02 $\Delta$ letS <i>plpg0279-gfp</i>                                                                         | This work             |
| MB1230                       | Lp02 $\Delta$ letA::kan <i>pflaA-gfp</i>                                                                       | (14)                  |
| EH370                        | Lp02 $\Delta$ letS::kan <i>pflaA-gfp</i>                                                                       | This work             |
| MB1234                       | Lp02 $\Delta$ rpoS::kan <i>pflaA-gfp</i>                                                                       | (34)                  |
| MB1014                       | Lp02 $\Delta$ relA::kan <i>pflaA-gfp</i>                                                                       | (64)                  |
| EH368                        | Lp02 $\Delta$ fliA::kan <i>pflaA-gfp</i>                                                                       | This work             |
| EH373                        | Lp02 Lpg0277 <sup>E521A</sup> <i>plpg0279</i>                                                                  | This work             |
| EH375                        | Lp02 Lpg0277 <sup>E396K</sup> <i>plpg0279</i>                                                                  | This work             |

868

869

870

871 **Table S2. Primers and plasmids used in this study**

872

873 Restriction enzyme sequences in **bold**

| <b>Primers</b>                                                                         |                                                               |                                                         |
|----------------------------------------------------------------------------------------|---------------------------------------------------------------|---------------------------------------------------------|
| <b>Construction of <i>lpg0279-gfp</i></b>                                              |                                                               |                                                         |
| <b>EH21</b>                                                                            | AAAGGATCCAAATATGGTTCACACCCTGAAAACTCGCAAC                      | Amplify 5' of <i>lpg0279</i> adding BamHI and XbaI      |
| <b>EH43</b>                                                                            | AAATCTAGAATTGCTGTGACTTGGAGGGAGCGGATGATTAATTATAG               |                                                         |
| <b>Construction of complementing vector <i>plpg0278-77</i></b>                         |                                                               |                                                         |
| <b>EH69</b>                                                                            | TATAGGATCCATGACAGAAATGCATCGGTTGTTGC                           | Amplify <i>lpg0278-lpg0277</i> adding BamHI and HindIII |
| <b>EH70</b>                                                                            | AAATAAGCTTTTATTTTGTCTATTTCCCTTGCGAAGTTTTTC                    |                                                         |
| <b>Construction of vector <i>plpg0279</i> (optimal RBS in <i>italics</i>)</b>          |                                                               |                                                         |
| <b>79OE-F</b>                                                                          | AAAGGATCCGAGGAGATATACATTCACAGCAATATGATGAAAATTGAATCATTTCC      | Amplify <i>lpg0279</i> adding BamHI and HindIII         |
| <b>79OE-R</b>                                                                          | AAAAAGCTTCTTTTTGGTTTATGGACTCTCTAACAGGGTCCG                    |                                                         |
| <b>Construction of deletion mutants (PO and P2 oligos from pKD4 <u>underlined</u>)</b> |                                                               |                                                         |
| <b>77del-F</b>                                                                         | ACTGTCCGCTATAAAAACCATGCTTGACGAAAAC                            | Amplify <i>lpg0277</i> + ~700bp flanking DNA            |
| <b>77del-R</b>                                                                         | AAGAGAGTATGAAGAACTGTTACAACGCATGGTGG                           |                                                         |
| <b>77PO-F</b>                                                                          | TTGCCCATCAATCCCAAACCTTGAGTACGAGGTAGAATGTGTAGGCTGGAGCTGCTTC    | Amplify Kan cassette with homology to <i>lpg0277</i>    |
| <b>77P2-R</b>                                                                          | CGGATAGCTCTTATAGATGCCAATGCGATTTTTATCCATATGAATATCCTCCTTAGTTCC  |                                                         |
| <b>78del-F</b>                                                                         | GAAAAATTGTAGACCATTGCATTGGGGCAGTAGG                            | Amplify <i>lpg0278</i> + ~700bp flanking DNA            |
| <b>78del-R</b>                                                                         | TTGAGTAATTGCCTTGACATATACTGAATGAGTTGGG                         |                                                         |
| <b>78PO-F</b>                                                                          | TAGAGAGTCCATAAAACCAAAAAGGAATTCAGTAATAATGTGTGTAGGCTGGAGCTGCTTC | Amplify Kan cassette with homology to <i>lpg0278</i>    |
| <b>78PO-R</b>                                                                          | AAAGATTCAGTACTCATTCTACCTCGTACTCAAGGCATATGAATATCCTCCTTAGTTCC   |                                                         |
| <b>79del-F</b>                                                                         | AATACTTAAAGGAAACCCATCCGACCATTCAAGC                            | Amplify <i>lpg0279</i> + ~700bp flanking DNA            |
| <b>79del-R</b>                                                                         | GTTTCGTC AAGCATGGTTTTTATAGCGGACAG                             |                                                         |
| <b>79PO-F</b>                                                                          | ACTATAATTAATCATAAGATAAATCCAAGTCACAGCAATTGTGTAGGCTGGAGCTGCTTC  | Amplify Kan cassette with homology to <i>lpg0279</i>    |
| <b>79PO-R</b>                                                                          | TGCATTTCTGTCATTATTACTGAATTCCTTTTTGGTCATATGAATATCCTCCTTAGTTCC  |                                                         |
| <b>Construction of point mutants</b>                                                   |                                                               |                                                         |
| <b>E396K-F</b>                                                                         | AAAGCATTACAACTTATCCCCACCAAGTCTGGCG                            |                                                         |
| <b>E396K-R</b>                                                                         | CGCCAGACTTGGTGGGGATAAGTTTGTAAATGCTTT                          |                                                         |
| <b>E521A-F</b>                                                                         | TCCACCGGATTAATGCTGCCATGGAACGAATCTCA                           |                                                         |
| <b>E521A-R</b>                                                                         | TGAGATTCGTTCCATGGCAGCATTAATCCGGTGA                            |                                                         |
| <b>D87N-F</b>                                                                          | GGGGCATTCTTATGTAAACAAAAGCGAGTGGGTATG                          |                                                         |
| <b>D87N-R</b>                                                                          | CATACCCACTCGCTTTTGTAAACATAAGAATGCCCC                          |                                                         |
| <b>Other oligos</b>                                                                    |                                                               |                                                         |
| <b>EH13</b>                                                                            | TCGGCAGAAGATTGGTATTAGG                                        | Fig 1A, set A/B                                         |
| <b>EH14</b>                                                                            | GCAATAAATTGAGTCCAACCTCTCC                                     |                                                         |



|             |                               |                 |
|-------------|-------------------------------|-----------------|
| <b>EH1</b>  | GGATCTGGGTGGTACACTTTATG       | Fig 1A, set C/D |
| <b>EH2</b>  | CAATGCCTTGAGTCGCTACA          |                 |
| <b>EH55</b> | TGAGTACTATCGATGCCATAAAAATCTCT | Fig 1A, set E/F |
| <b>EH56</b> | AGGCTTGAGCCAATTCTTCAATT       |                 |

874  
875

| <b>Plasmids</b>     |                                                                                                                                                                                  |           |
|---------------------|----------------------------------------------------------------------------------------------------------------------------------------------------------------------------------|-----------|
| <b>pGEMT-easy</b>   | Cloning vector; Amp <sup>R</sup>                                                                                                                                                 | Promega   |
| <b>pMMB206cam</b>   | Broad host range vector; pMMB66EH derivative; Cam <sup>R</sup>                                                                                                                   | (65)      |
| <b>pKD4</b>         | Source of <i>FRT-kan-FRT</i> allele                                                                                                                                              | (66)      |
| <b>pBH6119</b>      | ~800 bp <i>XbaI/PstI</i> fragment (containing GFP gene from <i>pGFPmut3</i> ) inserted into pJB98 at <i>XbaI</i> and <i>PstI</i> sites; Amp <sup>R</sup> ; <i>tdΔi</i>           | (13)      |
| <b>pflaA-gfp</b>    | pBH6119 with ~300 bp of <i>flaA</i> promoter region cloned into <i>BamHI</i> and <i>XbaI</i> sites; GFP transcriptional reporter plasmid                                         | This work |
| <b>plpg0279-gfp</b> | pBH6119 with ~830 bp of the <i>lpg0279-77</i> promoter region cloned into <i>BamHI</i> and <i>XbaI</i> sites; GFP transcriptional reporter plasmid                               | This work |
| <b>pHK/RR</b>       | pMMB206cam with ~3.6 kb PCR product of the <i>lpg0278</i> through <i>lpg0277</i> ORFs cloned into <i>BamHI</i> and <i>HindII</i> sites; IPTG-inducible plasmid; Cam <sup>R</sup> | This work |
| <b>plpg0279</b>     | pMMB206cam with ~1.2 kb PCR product containing the <i>lpg0279</i> ORF and optimal RBS cloned into <i>BamHI</i> and <i>HindII</i> sites; IPTG-inducible plasmid; Cam <sup>R</sup> | This work |

876  
877  
878

879 SUPPLEMENTAL FIGURES

880 Supplemental Figure 1

881

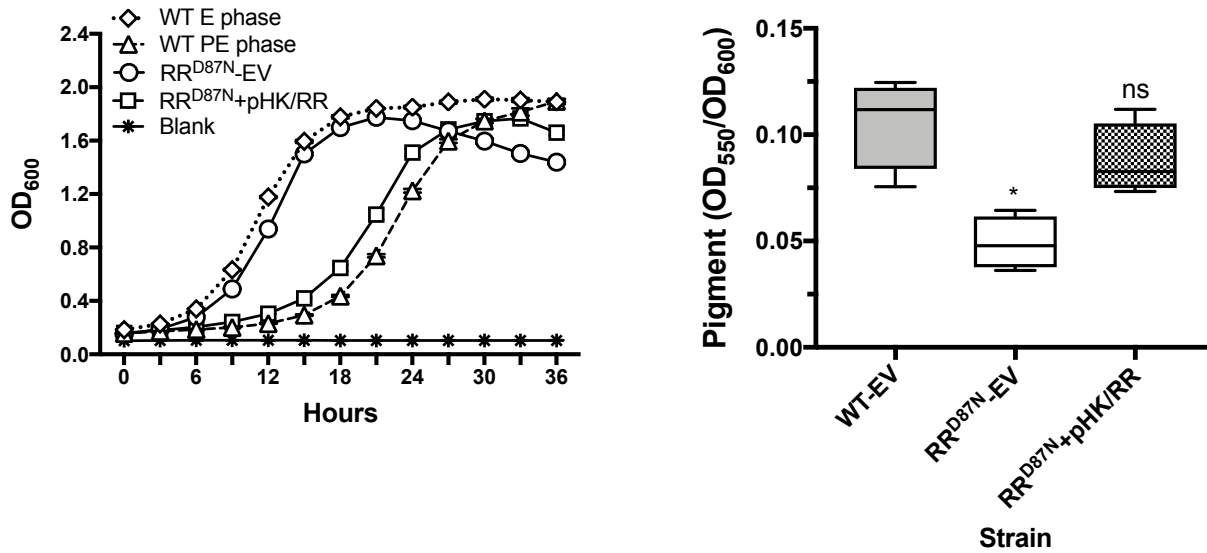

882

883

884 **Fig S1. The Lpg0277 RR phosphoacceptor site promotes *L. pneumophila* differentiation to the PE phase.**

885 Growth kinetics and pigment production by WT *L. pneumophila* and RR<sup>D87N</sup> phosphoacceptor site point mutant and  
886 the corresponding complemented strain. Results shown are representative of one other independent experiment. The  
887 Mann-Whitney test was used to determine statistically significant differences in pigmentation compared to WT (ns:  
888 not significant; \*,  $p < 0.05$ ). EV: strain harbors the pMMB206cam empty vector.

889

890

891

892

893 Supplemental Figure 2

A.

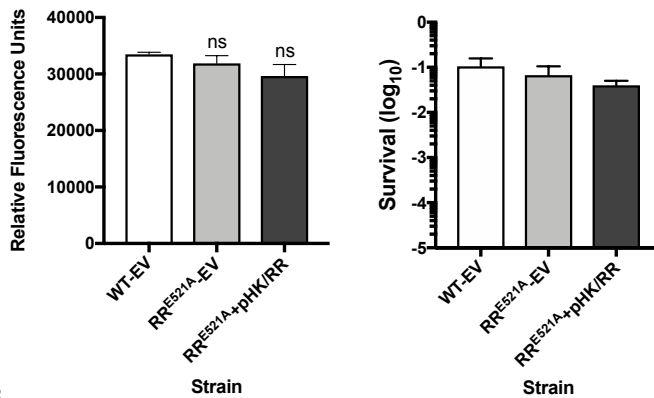

B.

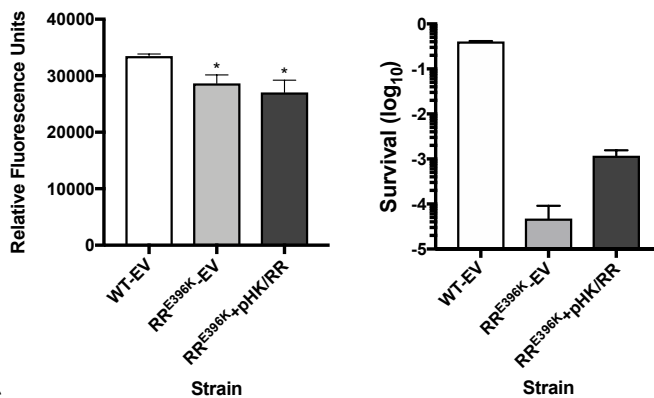

C.

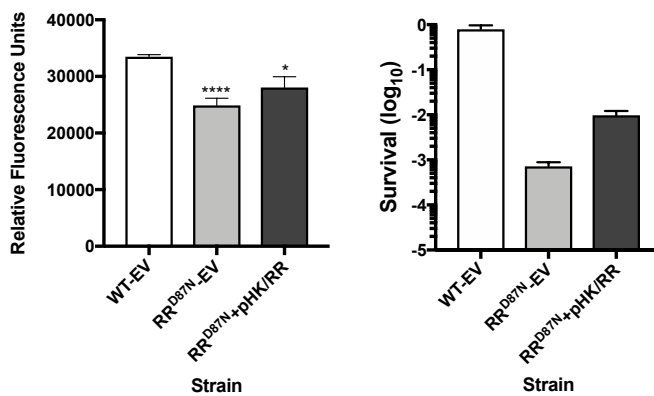

894  
895  
896  
897  
898  
899  
900  
901  
902  
903  
904  
905

**Fig. S2. The GGDEF domain and phosphoacceptor site of the RR contribute to PHB production and promote survival during prolonged nutrient deprivation.**

PHB quantification and survival of E phase cultures after 24 h and 7 d L-cysteine deprivation, respectively. WT *L. pneumophila* were compared to (A) RR<sup>E521A</sup> PDE, (B) RR<sup>E396K</sup> DCG, and (C) RR<sup>D87N</sup> phosphoacceptor site point mutants, and the respective complemented strains bearing plasmid pHK/RR. PHB values represent the means ± SE of pooled Nile Red fluorescence data from triplicate samples in four independent experiments. A two-tailed Student's t-test was used to determine statistically significant differences in fluorescence compared to WT-EV (ns: no significance; \*,  $p < 0.05$ ; \*\*\*\*,  $p < 0.0001$ ). Survival data is the ratio of CFU(day 7)/CFU(titer), and data is representative of results obtained in two or more independent experiments. EV: strain harbors the pMMB206cam empty vector.

906 Supplemental Figure 3  
907

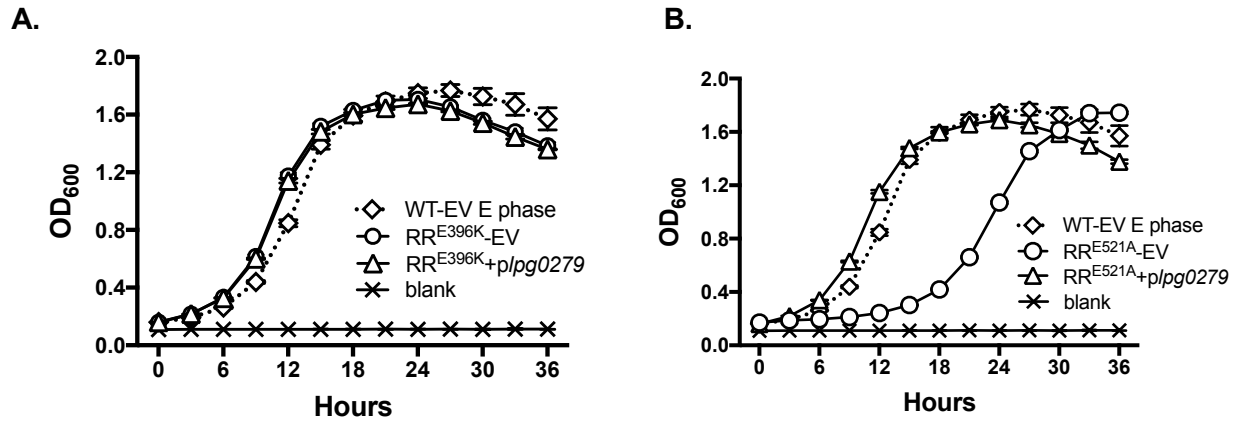

908  
909  
910  
911  
912  
913  
914  
915  
916

**Fig. S3. Disruption of the Lpg0277 RR<sup>E521A</sup> PDE domain is not sufficient to suppress the differentiation defect of PE phase *L. pneumophila* constitutively expressing *lpg0279*.** Growth kinetics of PE phase WT *L. pneumophila* and the (A) Lpg0277 RR<sup>E396K</sup> DCG and (B) RR<sup>E521A</sup> PDE point mutants that harbor either p/lpg0279 or pMMB206 empty vector (EV). Symbols denote the means  $\pm$  SE of triplicate samples, and data shown are representative of one additional independent experiment.
